Biological Sciences: Biochemistry

Multiple prebiotic metals mediate translation

Marcus S. Bray<sup>a\*</sup>, Tim K. Lenz<sup>b\*</sup>, Jessica C. Bowman<sup>b</sup>, Anton S. Petrov<sup>b</sup>, Amit R. Reddi<sup>b</sup>, Nicholas V. Hud<sup>b</sup>, Loren Dean Williams<sup>b,1</sup> and Jennifer B. Glass<sup>c,1</sup>

<sup>a</sup>School of Biological Sciences, Georgia Institute of Technology, 950 Atlantic Dr, Atlanta, GA, USA, 30332

<sup>b</sup>School of Chemistry and Biochemistry, Georgia Institute of Technology, 901 Atlantic Dr, Atlanta GA, USA, 30332

<sup>c</sup>School of Earth and Atmospheric Sciences, Georgia Institute of Technology, 311 Ferst Dr, Atlanta, GA, US, 30332

\*These two people have contributed equally to this work.

<sup>1</sup>To whom correspondence should be addressed:

Jennifer B. Glass: School of Earth & Atmospheric Sciences, Georgia Institute of Technology, Atlanta, GA 30332; [jennifer.glass@eas.gatech.edu](mailto:jennifer.glass@eas.gatech.edu); Tel. 404- 894-3942; Fax. 404-894-5638

Loren Dean Williams: School of Chemistry & Biochemistry, Georgia Institute of Technology, Atlanta, GA 30332; [loren.williams@chemistry.gatech.edu](mailto:loren.williams@chemistry.gatech.edu); Tel. 404-385-6258; Fax. 404-894-2295

**Keywords:** Translation, SHAPE, iron, manganese, magnesium, ribosome, ribosome function, ribosome structure, protein synthesis

**Running title:** Multiple prebiotic metals mediate translation

## ABSTRACT

1 Today,  $Mg^{2+}$  is an essential cofactor with diverse structural and functional roles in life's oldest  
2 macromolecular machine, the translation system. We tested whether ancient Earth conditions (low  $O_2$ , high  
3  $Fe^{2+}$ , high  $Mn^{2+}$ ) can revert the ribosome to a functional ancestral state. First, SHAPE (Selective 2'-  
4 Hydroxyl Acylation analyzed by Primers Extension) was used to compare the effect of  $Mg^{2+}$  vs.  $Fe^{2+}$  on the  
5 tertiary structure of rRNA. Then, we used *in vitro* translation reactions to test whether  $Fe^{2+}$  or  $Mn^{2+}$  could  
6 mediate protein production, and quantified ribosomal metal content. We found that: (i)  $Fe^{2+}$  and  $Mg^{2+}$  had  
7 strikingly similar effects on rRNA folding; (ii)  $Fe^{2+}$  and  $Mn^{2+}$  can replace  $Mg^{2+}$  as the dominant divalent  
8 cation during translation of mRNA to functional protein; (iii)  $Fe^{2+}$  and  $Mn^{2+}$  associated extensively with the  
9 ribosome. Given that the translation system originated and matured when  $Fe^{2+}$  and  $Mn^{2+}$  were abundant,  
10 these findings suggest that  $Fe^{2+}$  and  $Mn^{2+}$  played a role in early ribosomal evolution.

## 11 SIGNIFICANCE

12 Ribosomes are found in every living organism where they are responsible for the translation of messenger  
13 RNA into protein. The ribosome's centrality to cell function is underscored by its evolutionary  
14 conservation; the core structure has changed little since its inception ~4 billion years ago when ecosystems  
15 were anoxic and metal-rich. The ribosome is a model system for the study of bioinorganic chemistry, owing  
16 to the many highly coordinated divalent metal cations that are essential to its function. We studied the  
17 structure, function, and cation content of the ribosome under early Earth conditions (low  $O_2$ , high  $Fe^{2+}$ , high  
18  $Mn^{2+}$ ). Our results expand the roles of  $Fe^{2+}$  and  $Mn^{2+}$  in ancient and extant biochemistry as a cofactor for  
19 ribosomal structure and function.

20

21

22

23

24

25

26

27

28

29

30

31

32 \body

33 Life arose around 4 billion years ago on an anoxic Earth with abundant  $\text{Fe}^{2+}$  and  $\text{Mn}^{2+}$ , which would have  
34 maintained solubility in the absence of  $\text{O}_2$  (1-5). Biochemistry had access to these metals for over a billion  
35 years before biological  $\text{O}_2$  production was sufficient to oxidize and precipitate them. The pervasive use of  
36 these “prebiotic” metals in extant biochemistry, despite barriers to their biological acquisition, likely stems  
37 from their importance in the evolution of the early biochemical systems.

38  
39 The translation system, which synthesizes all coded protein (6), originated and matured during the Archean  
40 Eon (4-2.5 Ga) in low- $\text{O}_2$ , high- $\text{Fe}^{2+}$ , and high- $\text{Mn}^{2+}$  conditions (7). The common core of the ribosome, and  
41 many other aspects of the translation system, have remained essentially frozen since the last universal  
42 common ancestor (8). In extant biochemistry,  $\text{Mg}^{2+}$  ions are essential for both structure and function of the  
43 ribosome (9) and other enzymes involved in translation (10). In ribosomes,  $\text{Mg}^{2+}$  ions are observed in a  
44 variety of structural roles (**Table 1**), including in  $\text{Mg}^{2+}$ -rRNA clamps (11, 12) (**Fig. 1a**), in dinuclear  
45 microclusters that frame the peptidyl transferase center (PTC) (12) (**Fig. 1b**), and at the small subunit-large  
46 subunit (SSU-LSU) interface (13) (**Fig. 1c**). Functional  $\text{Mg}^{2+}$  ions stabilize a critical bend in mRNA  
47 between the P-site and A-site codons (14) (**Fig. 1d**), and mediate rRNA-tRNA and rRNA-mRNA  
48 interactions (15) (**Fig. 1e, f**). Accessory enzymes needed for translation – aminoacyl tRNA synthetases,  
49 methionyl-tRNA transformylase, creatine kinase, myokinase, and nucleoside-diphosphate kinase – also  
50 require  $\text{Mg}^{2+}$  ions as cofactors (**Table 1**).

51  
52 There is abundant evidence that multiple types of cationic species can interact productively with various  
53 RNAs (16-18). Recent results support a model in which  $\text{Fe}^{2+}$  and  $\text{Mn}^{2+}$ , along with  $\text{Mg}^{2+}$ , were critical  
54 cofactors for ancient nucleic acid function. As predicted by this model, functional  $\text{Mg}^{2+}$ -to- $\text{Fe}^{2+}$   
55 substitutions under anoxic conditions were experimentally verified to support RNA folding and catalysis  
56 by ribozymes (19, 20), a DNA polymerase, a DNA ligase, and an RNA polymerase (21). Functional  $\text{Mg}^{2+}$ -  
57 to- $\text{Mn}^{2+}$  substitution has long been known for DNA polymerase (21-23). In contrast to  $\text{Mg}^{2+}$ ,  $\text{Fe}^{2+}$  has been  
58 shown to more effectively ‘activate’ RNA. The phosphate affinity of  $\text{Fe}^{2+}$ , because of the lower energies of  
59 its d-orbitals, is slightly greater than that of  $\text{Mg}^{2+}$ . In first shell coordination complexes, the proximal  
60 phosphorus shows greater electron depletion and enhanced susceptibility to nucleophilic attack. Therefore,  
61 for at least some nucleic acid processing enzymes, optimal activity is observed at lower concentrations of  
62  $\text{Fe}^{2+}$  than  $\text{Mg}^{2+}$  (19, 21).

63  
64 Based on these previous results, we hypothesized that  $\text{Fe}^{2+}$  and  $\text{Mn}^{2+}$  could partially or fully replace  $\text{Mg}^{2+}$   
65 in the ribosome during translation. In this study, we relocated the translation system to the low- $\text{O}_2$ , high-  
66  $\text{Fe}^{2+}$ , and high- $\text{Mn}^{2+}$  environment of its ancient roots, and compared its structure, function, and cation  
67 content under modern vs. ancient conditions.

## 68 69 **Results**

70  
71 ***Fe<sup>2+</sup> folds LSU rRNA to a near-native state.*** To test whether  $\text{Fe}^{2+}$  can substitute for  $\text{Mg}^{2+}$  in folding rRNA  
72 to a native-like state, we compared LSU rRNA folding in the presence of  $\text{Fe}^{2+}$  or  $\text{Mg}^{2+}$  by SHAPE (Selective  
73 2'-Hydroxyl Acylation analyzed by Primer Extension). SHAPE provides quantitative, nucleotide resolution  
74 information about flexibility, base pairing and 3D structure, and has previously been used to monitor the  
75 influence of cations, small molecules, or proteins on RNA structure (24-28). We previously used SHAPE  
76 to show that the LSU rRNA adopts a near-native state in the presence of  $\text{Mg}^{2+}$ , with the core inter-domain  
77 architecture of the assembled ribosome and residues positioned for interactions with rProteins (29). In this  
78 study, SHAPE experiments were performed in an anoxic chamber to maintain the oxidation state and  
79 solubility of  $\text{Fe}^{2+}$ . The minimum concentration required to fully fold rRNA, 2.5 mM  $\text{Fe}^{2+}$  or 10 mM  $\text{Mg}^{2+}$ ,  
80 was used for all SHAPE experiments (**Additional Data Table S1**).

81 Addition of  $\text{Fe}^{2+}$  or  $\text{Mg}^{2+}$  induced widespread structural changes in the  $\text{Na}^+$ -form LSU rRNA, reflected in  
82 SHAPE reactivity as  $\Delta\text{Fe}^{2+}$  or  $\Delta\text{Mg}^{2+}$  (see **Materials and Methods**) and displayed as ‘heat maps’ on the  
83 LSU rRNA secondary structure (**Fig. 2**). The  $\Delta\text{Fe}^{2+}$  and  $\Delta\text{Mg}^{2+}$  heat maps were broadly similar at the  
84 nucleotide and regional scales (**Fig. 2d, e**), indicating similar effects of  $\text{Fe}^{2+}$  or  $\text{Mg}^{2+}$  on rRNA folding.  
85 Helical regions tended to be invariant, whereas rRNA loops and bulges were impacted by addition of  $\text{Fe}^{2+}$   
86 or  $\text{Mg}^{2+}$ . Of the sites that exhibited a significant response ( $>0.3$  SHAPE units) to  $\text{Mg}^{2+}$ , 86% of nucleotides  
87 (43/50) exhibited a similar trend with  $\text{Fe}^{2+}$ . The greatest discrepancy between  $\text{Fe}^{2+}$  and  $\text{Mg}^{2+}$  is observed in  
88 the L11 binding domain (**Fig. 2d, e**).

89 ***Fe<sup>2+</sup> and Mn<sup>2+</sup> mediate translation.*** Translation reactions were performed in an anoxic chamber in the  
90 presence of different divalent cations and cation concentrations. Production of the protein dihydrofolate  
91 reductase (DHFR) from its mRNA was used to monitor translational activity. Protein synthesis was assayed  
92 by measuring the rate of NADPH oxidation by DHFR. These reactions were conducted in a small  
93 background of 2.5 mM  $\text{Mg}^{2+}$  (**Fig. S1a**). This background is below the requirement to support translation,  
94 consistent with previous findings that a minimum of  $\sim 5$  mM  $\text{Mg}^{2+}$  is needed for assembly of mRNA onto  
95 the SSU (30-32). As a control, we recapitulated the previously established  $\text{Mg}^{2+}$  dependence of the  
96 translation system, and then repeated the assay with  $\text{Fe}^{2+}$ .

97  
98 The activity profile of the translation system with varied  $\text{Fe}^{2+}$  closely tracked the profile with varied  $\text{Mg}^{2+}$   
99 (**Fig. 3**). Below 7.5 mM total divalent cation concentration, minimal translation occurred with either  $\text{Fe}^{2+}$   
100 or  $\text{Mg}^{2+}$ , as observed elsewhere (33). Activity peaked at 9.5 mM for both cations and decreased modestly  
101 beyond the optimum. At a given divalent cation concentration,  $\text{Fe}^{2+}$  supported around 50-80% of activity  
102 with  $\text{Mg}^{2+}$ . This result was observed with translation reactions run for 15, 30, 45, 60, 90 and 120 min with  
103 optimal divalent cation concentrations (**Fig. 4**). Along with  $\text{Mg}^{2+}$  and  $\text{Fe}^{2+}$ , we investigated the abilities of  
104 other divalent cations to support translation, including  $\text{Mn}^{2+}$ ,  $\text{Co}^{2+}$ ,  $\text{Cu}^{2+}$ , and  $\text{Zn}^{2+}$ . We found that  $\text{Mn}^{2+}$   
105 supported translation at levels similar to  $\text{Fe}^{2+}$ , whereas no activity was detected with  $\text{Co}^{2+}$ ,  $\text{Cu}^{2+}$ , or  $\text{Zn}^{2+}$   
106 (**Fig. S2**).

107  
108 To test whether alternative divalent cations could completely replace  $\text{Mg}^{2+}$  in translation, we decreased the  
109 background  $\text{Mg}^{2+}$  from 2.5 to 1 mM by thoroughly washing the ribosomes prior to translation reactions  
110 with 7-11 mM  $\text{Fe}^{2+}$  or  $\text{Mn}^{2+}$  (**Fig. S1b**). With 1 mM background  $\text{Mg}^{2+}$ ,  $\text{Fe}^{2+}$  supported 12-23% of the activity  
111 with  $\text{Mg}^{2+}$  over the concentrations tested, while  $\text{Mn}^{2+}$  supported 43-50% activity relative to  $\text{Mg}^{2+}$  (**Fig. 5a**).  
112 Washing the factor mix allowed us to decrease the background  $\text{Mg}^{2+}$  in translation reactions to  $\sim 4$ -6  $\mu\text{M}$   
113 (**Fig. S1c**). At this level, minimal protein production was observed with  $\text{Fe}^{2+}$ , while  $\text{Mn}^{2+}$  supported 29-38%  
114 of the activity measured with  $\text{Mg}^{2+}$  (**Fig. 5b**).

115  
116 ***Fe<sup>2+</sup> and Mn<sup>2+</sup> associate extensively with the ribosome.*** To experimentally confirm that  $\text{Fe}^{2+}$  and  $\text{Mn}^{2+}$   
117 associate with the assembled ribosome, we analyzed the  $\text{Fe}^{2+}$  and  $\text{Mn}^{2+}$  content of ribosomes after  
118 incubation in anoxic reaction buffer containing 7 mM  $\text{Fe}^{2+}$  or 7 mM  $\text{Mn}^{2+}$ . Under the conditions of our  
119 translation reactions,  $584 \pm 9$   $\text{Fe}^{2+}$  ions or  $507 \pm 28$   $\text{Mn}^{2+}$  ions associate with each ribosome.

120  
121 Finally, we computationally investigated whether  $\text{Mg}^{2+}$ ,  $\text{Fe}^{2+}$ , and  $\text{Mn}^{2+}$  might be interchangeable during  
122 translation using quantum mechanical characterization of  $\text{M}^{2+}$ -rRNA clamps, which are frequent in the  
123 ribosome (11, 12) (**Fig. 1a, S3**). The geometries of  $\text{Fe}^{2+}$ -rRNA clamps and  $\text{Mg}^{2+}$ -rRNA clamps are nearly  
124 identical (**Table S1**). However, due to the accessibility of its d-orbitals, more charge is transferred to  $\text{Fe}^{2+}$   
125 (**Table S2**), leading to greater stability of  $\text{Fe}^{2+}$ -rRNA vs.  $\text{Mg}^{2+}$ -rRNA clamps (**Table S3**). The effect of the  
126 modestly greater radius of  $\text{Mn}^{2+}$  (**Table S1**) is offset by d-orbital charge transfer (**Table S2**), leading to  
127 comparable stabilities of  $\text{Mg}^{2+}$ -rRNA and  $\text{Mn}^{2+}$ -rRNA clamps (**Table S3**).

128  
129 **Discussion**

130 In this study, we successfully replaced ribosomal  $Mg^{2+}$  with  $Fe^{2+}$  or  $Mn^{2+}$  under conditions mimicking the  
131 anoxic Archean Earth. Previously, the only cation known to mediate rRNA folding and function of the  
132 translation system was  $Mg^{2+}$ . We found that rRNA folds to the same extent, and to essentially the same  
133 global state (34, 35), with  $Fe^{2+}$  or  $Mg^{2+}$  under anoxia. The minimum concentration of  $Fe^{2+}$  required to fold  
134 the rRNA is 4-fold less than the requisite  $Mg^{2+}$  concentration. We showed that  $Fe^{2+}$  or  $Mn^{2+}$  can serve as  
135 the dominant divalent cation during translation. Background  $Mg^{2+}$  as high as 2.5 mM was insufficient to  
136 mediate protein synthesis, and at least 5 mM additional  $Mg^{2+}$ ,  $Fe^{2+}$ , or  $Mn^{2+}$  was required to restore  
137 translational activity. Further, we demonstrated that  $Mn^{2+}$  can mediate translation in place of  $Mg^{2+}$ ,  
138 suggesting that  $Mn^{2+}$  can mediate each of the  $M^{2+}$ -rRNA interactions in **Fig. 1**. These findings suggest that  
139 functional  $Mg^{2+}$ - $Mn^{2+}$  and  $Mg^{2+}$ - $Fe^{2+}$  substitutions can occur in large ribozymes, similar to previous reports  
140 for protein enzymes and small ribozymes (21-23, 36, 37). Near-complete removal of  $Mg^{2+}$  prevented  $Fe^{2+}$ -  
141 mediated translation and partially inhibited  $Mn^{2+}$ -mediated translation, suggesting that  $Mg^{2+}$  is optimal for  
142 some specific roles in the translation system. Regardless, the general effectiveness of  $Mg^{2+}$ - $Mn^{2+}$  and  $Mg^{2+}$ -  
143  $Fe^{2+}$  substitutions in the translation system is astounding considering the enormous number of divalent  
144 cations associated with a given ribosome, and the diversity of their structural and functional roles (9, 10)  
145 (**Table 1, Fig. 1**).

146 The observation that  $>500$   $Fe^{2+}$  or  $Mn^{2+}$  ions can associate with a ribosome is consistent with the extent of  
147  $Mg^{2+}$  association observed by x-ray diffraction (100-1000  $Mg^{2+}$  per ribosome (38)), and supports a model  
148 in which  $Fe^{2+}$  or  $Mn^{2+}$  has replaced  $Mg^{2+}$  as the dominant divalent cation in our experiments. The high  
149 capacity of ribosomes for  $Fe^{2+}$  and  $Mn^{2+}$  reflects all ribosome-associated ions, including condensed, glassy  
150 and chelated divalent cations (39), and possibly also ions associated with ribosomal proteins, such as those  
151 previously shown to bind  $Zn^{2+}$  (e.g. S2, S15, S16, S17, L2, L13, L31, L36 in *E. coli*) (40).

152 The differences in protein production observed among the three divalent cations in this study arise from a  
153 variety of evolutionary, and physiological factors. For instance, *E. coli* may be evolutionarily adapted to  
154 use  $Mg^{2+}$  instead of  $Fe^{2+}$  or  $Mn^{2+}$  in ribosomes. The difference in translational activity between  $Mn^{2+}$  and  
155  $Fe^{2+}$ , particularly when background  $Mg^{2+}$  was removed, suggests that  $Mn^{2+}$  is more viable upon full  
156 substitution. Such  $Mn^{2+}/Mg^{2+}$  interchangeability may result from the comparable stabilities of  $Mn^{2+}$  and  
157  $Mg^{2+}$  in  $M^{2+}$ -rRNA clamps (**Fig. S3**). An additional contribution to the lower net effectiveness of  $Fe^{2+}$  in  
158 translation may be due to its higher redox activity; indeed,  $Fe^{2+}$ -mediated oxidative damage to RNA has  
159 been observed in ribosomes purified from Alzheimer hippocampus (41).

160  
161 Besides the ribosome, our translation reactions utilize many accessory enzymes such as elongation factors  
162 and aminoacyl-tRNA synthetases that also have divalent cation requirements. Therefore, both  $Mn^{2+}$  and  
163  $Fe^{2+}$  may be fully functional ribosomal substitutes with different effectiveness caused by lower activity of  
164 one or more of these accessory enzymes. Indeed, the relative activity of arginine t-RNA synthetase and  
165 myokinase are both lower with  $Mn^{2+}$  or  $Fe^{2+}$  than with  $Mg^{2+}$  (42, 43).

166  
167 While intracellular  $Mg^{2+}$  is consistently  $10^{-3}$  M in cellular life (44), specific physiological or environmental  
168 conditions can significantly elevate intracellular  $Fe^{2+}$  and  $Mn^{2+}$ . Under oxidative stress, some microbes  
169 accumulate excess  $Mn^{2+}$  (e.g. radiation-tolerant *Deinococcus radiodurans* contains  $\sim 10$  times higher  $Mn^{2+}$   
170 than *E. coli* ( $\sim 10^{-5}$  M  $Mn^{2+}$  (45, 46))). In the absence of oxygen, *E. coli* contains  $\sim 10$  times higher labile  
171  $Fe^{2+}$  ( $\sim 10^{-4}$  M) than when grown with oxygen ( $\sim 10^{-5}$  M (47)). Thus, it is possible that the absence of  $Fe^{2+}$   
172 and  $Mn^{2+}$  in experimentally determined ribosomal structures is reflective of culturing and purification  
173 conditions (high  $O_2$ , high  $Mg^{2+}$ , low  $Fe^{2+}$ , and low  $Mn^{2+}$ ), and that other cations may also be present under  
174 diverse physiological conditions.

175 We have shown that the translation system functions with mixtures of divalent cations, which are variable  
176 during long-term evolutionary processes and during short term changes in bioavailability and oxidative  
177 stress. When combined with previous results that DNA replication and transcription can be facilitated by  
178  $Fe^{2+}$  and  $Mn^{2+}$  (16-23, 36, 37), our findings that  $Fe^{2+}$  can mediate rRNA folding and that both  $Fe^{2+}$  and  $Mn^{2+}$

179 can support translation of active protein has revealed that these prebiotically relevant metals can facilitate  
180 the entire central dogma of molecular biology (DNA→RNA→protein). These findings raise important  
181 questions about evolutionary and physiological roles for Fe<sup>2+</sup> and Mn<sup>2+</sup> in ancient and extant biological  
182 systems. Were Mg<sup>2+</sup>, Fe<sup>2+</sup> and Mn<sup>2+</sup> collaborators as cofactors on the ancient Earth, when Fe<sup>2+</sup> and Mn<sup>2+</sup>  
183 were more abundant (1-5), and Mg<sup>2+</sup> was less abundant (2), than today? What was the role of Fe<sup>2+</sup> and Mn<sup>2+</sup>  
184 in the origin and early evolution of the translational system? Finally, what are the implications for ribosome-  
185 bound Fe<sup>2+</sup> in oxidative damage and disease?

## 186 **Materials and Methods**

187  
188 **rRNA folding via SHAPE.** SHAPE methods were adapted from previously published protocols (29) using  
189 the intact ~2900 nt *Thermus thermophilus* 23 rRNA (LSU) in the presence of 250 mM Na<sup>+</sup>, which favors  
190 formation of secondary structure, and in 250 mM Na<sup>+</sup> plus a divalent cation (10 mM Mg<sup>2+</sup> or 2.5 mM Fe<sup>2+</sup>,  
191 both as chloride salts) to favor formation of tertiary interactions. Adaptations were made to facilitate folding  
192 and N-methylisatoic anhydride modification of RNA in an anoxic chamber under a 98% Ar and 2% H<sub>2</sub>  
193 atmosphere. To keep rRNA samples oxygen-free, rRNA samples in 200 mM NaOAc, 50 mM NaHEPES  
194 (pH 8) were lyophilized, transferred into the anoxic chamber, and rehydrated with nuclease-free, degassed  
195 water. After rRNA modification, as described in ref. (29), divalent cations were extracted from the rRNA  
196 by chelating beads. Samples were then removed from the anoxic chamber for analysis by capillary  
197 electrophoresis (29). Nucleotides were classified as exhibiting a significant change in SHAPE reactivity if  
198 either the original reactivity (in Na<sup>+</sup>) or final reactivity (in Na<sup>+</sup>/Mg<sup>2+</sup> or Na<sup>+</sup>/Fe<sup>2+</sup>) was >0.3 SHAPE units.  
199 To compare the Fe<sup>2+</sup>- and Mg<sup>2+</sup>-responsiveness of specific nucleotides, we binned nucleotides into three  
200 categories (increased, decreased, or little/no change) based on their general SHAPE reactivity response to  
201 each divalent cation (SHAPE data are found in **Additional Data Table S1**).

202 **In vitro translation.** Each 30 μL reaction contained 2 μM (4.5 μL of 13.3 μM stock) *E. coli* ribosomes in  
203 10 mM Mg<sup>2+</sup> (New England Biolabs, Ipswich MA, USA; catalog # P0763S), 3 μL factor mix (with RNA  
204 polymerase, and transcription/translation factors in 10 mM Mg<sup>2+</sup>) from the PURExpress® Δ Ribosome Kit  
205 (New England Biolabs E3313S), 0.1 mM amino acid mix (Promega, Madison WI, USA; catalog # L4461),  
206 and 0.2 mM tRNAs from *E. coli* MRE 600 (Sigma-Aldrich, St. Louis MO, USA; product # TRNAMRE-  
207 RO). Thus, a total of 2.5 mM “background” Mg<sup>2+</sup> was present in each reaction (**Fig. S1a**). To remove the  
208 background Mg<sup>2+</sup>, we exchanged the buffer of the ribosome and factor mix using centrifugal filter units.  
209 Thirty microliters of either ribosome solution or factor mix was added to an Amicon Ultra 0.5 mL  
210 centrifugal filter (Millipore-Sigma), followed by 450 μL of divalent-free buffer (20 mM HEPES pH 7.6, 30  
211 mM KCl, and 7 mM β-mercaptoethanol). Samples were spun at 14,000 x g at 4°C until the minimum  
212 sample volume (~15 μL) was reached. The samples were resuspended in 450 μL of divalent-free buffer and  
213 centrifugation was repeated. The samples were then transferred to new tubes and 15 μL of divalent-free  
214 buffer was added to bring the volume to 30 μL. This process decreased Mg<sup>2+</sup> concentrations in the ribosome  
215 and factor mix from 10 mM to 10-30 μM Mg<sup>2+</sup>, resulting in 4-6 μM Mg<sup>2+</sup> in each reaction (**Fig. S1b, S1c**).

216  
217 **Translation reaction buffer.** The reaction buffer was based on Shimizu et al. (48), with HEPES-OH  
218 instead of phosphate buffer to avoid precipitation of metal phosphates. We found that rates of translation  
219 were consistently lower with Tris-HCl than HEPES-OH, and therefore HEPES-OH was used as the buffer  
220 for all experiments. Buffer consisted of 20 mM HEPES-OH (pH 7.3), 95 mM potassium glutamate, 5 mM  
221 NH<sub>4</sub>Cl, 0.5 mM CaCl<sub>2</sub>, 1 mM spermidine, 8 mM putrescine, 1 mM dithiothreitol (DTT), 2 mM adenosine  
222 triphosphate (ATP), 2 mM guanosine triphosphate (GTP), 1 mM uridine triphosphate (UTP), 1 mM cytidine  
223 triphosphate (CTP), 10 mM creatine phosphate (CP), and 53 μM 10-formyltetrahydrofolate. The reaction  
224 buffer was lyophilized and stored at -80°C until resuspension in anoxic nuclease-free water immediately  
225 before experiments in an anoxic chamber.

226

227 **Translation experimental conditions.** All reactions (30  $\mu\text{L}$  total volume) were assembled and incubated  
228 in the anoxic chamber. All divalent cation salts used in experiments ( $\text{MgCl}_2$ ,  $\text{FeCl}_2$ ,  $\text{MnCl}_2$ ,  $\text{Zn(OAc)}_2$ ,  
229  $\text{CoCl}_2$ ,  $\text{CuSO}_4$ ) were added to 7 mM final concentration, with the exception of  $\text{MgCl}_2$  and  $\text{FeCl}_2$ , which  
230 were tested over a range of final concentrations (1, 3, 4, 5, 6, 7, 8, 9, and 11 mM; **Fig. S1**). Solutions were  
231 clear, with no indication of metal precipitate, suggesting that reduced, divalent metals cations were the  
232 primary chemical species. All experiments were assembled in the following order: dihydrofolate reductase  
233 (DHFR) mRNA (~5  $\mu\text{g}$  per 30  $\mu\text{L}$  reaction; see **Supplemental Information** for more details), factor mix,  
234 ribosomes, amino acids, tRNA, nuclease-free  $\text{H}_2\text{O}$ , reaction buffer. Changing the order of reactant addition  
235 did not affect translational activity. Reactions were run in triplicate on a 37°C heat block for up to 120  
236 minutes. Reactions were quenched on ice and stored on ice until they were assayed for protein synthesis.

237  
238 **Protein activity assay.** Protein synthesis was measured using a DHFR assay kit (Sigma-Aldrich product #  
239 CS0340), which measures the oxidation of NADPH (60 mM) to  $\text{NADP}^+$  by dihydrofolic acid (51  $\mu\text{M}$ ).  
240 Assays were performed by adding 5  $\mu\text{L}$  of protein synthesis reaction to 995  $\mu\text{L}$  of 1x assay buffer. The  
241 NADPH absorbance peak at 340 nm ( $\text{Abs}_{340}$ ) was measured in 15 s intervals over 2.5 min. The slope of the  
242 linear regression of  $\text{Abs}_{340}$  vs. time was used to determine protein activity ( $\text{Abs}_{340} \text{ min}^{-1}$ ). Different counter  
243 ions ( $\text{Cl}^-$ ,  $\text{CH}_3\text{COO}^-$ ,  $\text{SO}_4^{2-}$ ) had no effect on protein synthesis from mRNA. To our knowledge, no  
244 dependence on, nor inhibitory effect of  $\text{Mg}^{2+}$  or  $\text{Fe}^{2+}$  exists for DHFR. We confirmed this by varying the  
245 amounts of metals in our assay reaction, which had no effect on DHFR activity (data not shown).

246  
247 **Ribosome metal content.** The Fe and Mn content of *E. coli* ribosomes was measured by total reflection x-  
248 ray fluorescence (TRXF) spectroscopy after the ribosomes were incubation in 7 mM  $\text{FeCl}_2$  or 7 mM  $\text{MnCl}_2$ .  
249 Detailed methods are provided in the **Supplemental Information**.

250 **Quantum mechanical calculations.** The atomic coordinates of a  $\text{Mg}^{2+}$ -rRNA clamp were initially  
251 extracted from the X-ray structure of the *Haloarcula marismortui* large ribosomal subunit (PDB 1JJ2) (49).  
252 The free 5' and 3' termini of the phosphate groups were capped with methyl groups in lieu of the remainder  
253 of the RNA polymer, and hydrogen atoms were added, where appropriate (**Fig. S3**). The details of  
254 calculations were adapted from previous publications (11, 19) and are provided in the **Supplemental**  
255 **Information**.

256 **ACKNOWLEDGMENTS.** This research was supported by the National Aeronautics and Space  
257 Administration grants NNX14AJ87G, NNX16AJ28G, and NNX16AJ29G. We acknowledge helpful  
258 discussions with Corinna Tuckey of New England Biolabs, and with Eric B. O'Neill and Claudia Montllor  
259 Albalade of Georgia Institute of Technology. We thank Michael Goodisman for access to a capillary  
260 electrophoresis instrument.

261  
262 **Competing interests.** The authors declare that they have no competing interests with the contents of this  
263 article.

264 **Author contributions:** MSB, TKL, JCB, ARR, NVH, LDW, and JBG conceived and designed the  
265 experiments. MSB and TKL collected data and performed analysis. ASP contributed analysis. MSB,  
266 TKL, LDW, and JBG wrote the paper with editorial input from all authors.

## 267 **References**

- 268 1. Derry LA (2015) Causes and consequences of mid-Proterozoic anoxia. *Geophys. Res. Lett.*  
269 42(20):8538-8546.
- 270 2. Jones C, Nomosatryo S, Crowe SA, Bjerrum CJ, & Canfield DE (2015) Iron oxides, divalent  
271 cations, silica, and the early earth phosphorus crisis. *Geology* 43(2):135-138.
- 272 3. Poulton SW & Canfield DE (2011) Ferruginous conditions: a dominant feature of the ocean  
273 through Earth's history. *Elements* 7(2):107-112.

- 274 4. Holland HD (1984) *The Chemical Evolution of the Atmosphere and Oceans* (Princeton University  
275 Press, Princeton, N.J.).
- 276 5. Johnson JE, Webb SM, Ma C, & Fischer WW (2016) Manganese mineralogy and diagenesis in  
277 the sedimentary rock record. *Geochem. Cosmochim. Acta* 173:210-231.
- 278 6. Ramakrishnan V (2002) Ribosome structure and the mechanism of translation. *Cell* 108(4):557-  
279 572.
- 280 7. Fox GE (2010) Origin and evolution of the ribosome. *Cold Spring Harb. Perspect.* 2(9):a003483.
- 281 8. Bernier CR, Petrov AS, Kovacs NA, Penev PI, & Williams LD (2018) Translation: The Universal  
282 Structural Core of Life. *Mol Biol Evol*:10.1093/molbev/msy1101.
- 283 9. Klein DJ, Moore PB, & Steitz TA (2004) The contribution of metal ions to the structural stability  
284 of the large ribosomal subunit. *RNA* 10(9):1366-1379.
- 285 10. Cusack S (1997) Aminoacyl-tRNA synthetases. *Curr. Opin. Struct. Biol.* 7(6):881-889.
- 286 11. Petrov AS, Bowman JC, Harvey SC, & Williams LD (2011) Bidentate RNA–magnesium clamps:  
287 On the origin of the special role of magnesium in RNA folding. *RNA* 17(2):291-297.
- 288 12. Hsiao C & Williams LD (2009) A recurrent magnesium-binding motif provides a framework for  
289 the ribosomal peptidyl transferase center. *Nucleic Acid Res.* 37(10):3134-3142.
- 290 13. Schuwirth BS, *et al.* (2005) Structures of the bacterial ribosome at 3.5 Å resolution. *Science*  
291 310(5749):827-834.
- 292 14. Demeshkina N, Jenner L, Westhof E, Yusupov M, & Yusupova G (2012) A new understanding  
293 of the decoding principle on the ribosome. *Nature* 484(7393):256-259.
- 294 15. Selmer M, *et al.* (2006) Structure of the 70S ribosome complexed with mRNA and tRNA.  
295 *Science* 313(5795):1935-1942.
- 296 16. Pyle A (2002) Metal ions in the structure and function of RNA. *J. Biol. Inorg. Chem.* 7(7):679-  
297 690.
- 298 17. Pyle AM (1993) Ribozymes: a distinct class of metalloenzymes. *Science* 261(5122):709-714.
- 299 18. Ward WL, Plakos K, & DeRose VJ (2014) Nucleic acid catalysis: metals, nucleobases, and other  
300 cofactors. *Chem. Rev.* 114(8):4318-4342.
- 301 19. Athavale SS, *et al.* (2012) RNA folding and catalysis mediated by iron (II). *PLoS One*  
302 7(5):e38024.
- 303 20. Popović M, Fliss PS, & Ditzler MA (2015) *In vitro* evolution of distinct self-cleaving ribozymes  
304 in diverse environments. *Nucleic Acids Res.* 43(14):7070-7082.
- 305 21. Okafor CD, *et al.* (2017) Iron mediates catalysis of nucleic acid processing enzymes: support for  
306 Fe (II) as a cofactor before the great oxidation event. *Nucleic Acids Res.* 45(7):3634-3642.
- 307 22. Tabor S & Richardson CC (1989) Effect of manganese ions on the incorporation of  
308 dideoxynucleotides by bacteriophage T7 DNA polymerase and *Escherichia coli* DNA polymerase  
309 I. *Proc. Natl. Acad. Sci.* 86(11):4076-4080.
- 310 23. Litman RM (1971) The differential effect of magnesium and manganese ions on the synthesis of  
311 poly (dGd· C) and *Micrococcus luteus* DNA by *Micrococcus luteus* DNA polymerase. *J. Mol.*  
312 *Biol.* 61(1):1-23.
- 313 24. Dann III CE, *et al.* (2007) Structure and mechanism of a metal-sensing regulatory RNA. *Cell*  
314 130(5):878-892.
- 315 25. Mortimer SA & Weeks KM (2007) A fast-acting reagent for accurate analysis of RNA secondary  
316 and tertiary structure by SHAPE chemistry. *J. Am. Chem. Soc.* 129(14):4144-4145.
- 317 26. Athavale SS, *et al.* (2012) Domain III of the *T. thermophilus* 23S rRNA folds independently to a  
318 near-native state. *RNA* 18(4):752-758.
- 319 27. Hsiao C, *et al.* (2013) Molecular paleontology: a biochemical model of the ancestral ribosome.  
320 *Nucleic Acids Research* 41(5):3373-3385.
- 321 28. Lanier KA, Athavale SS, Petrov AS, Wartell R, & Williams LD (2016) Imprint of ancient  
322 evolution on rRNA folding. *Biochemistry* 55(33):4603-4613.
- 323 29. Lenz TK, Norris AM, Hud NV, & Williams LD (2017) Protein-free ribosomal RNA folds to a  
324 near-native state in the presence of Mg<sup>2+</sup>. *RSC Adv.* 7(86):54674-54681.



- 325 30. Takanami M & Okamoto T (1963) Interaction of ribosomes and synthetic polyribonucleotides. *J.*  
326 *Mol. Biol.* 7(4):323-333.
- 327 31. Kigawa T, *et al.* (1999) Cell-free production and stable-isotope labeling of milligram quantities of  
328 proteins. *FEBS Lett.* 442(1):15-19.
- 329 32. Goldberg A (1966) Magnesium binding by *Escherichia coli* ribosomes. *J. Mol. Biol.* 15(2):663-  
330 673.
- 331 33. Pronczuk A, Baliga B, & Munro H (1968) Effect of nucleoside triphosphate and magnesium ion  
332 concentration on the stability and function of rat liver polysomes *in vitro*. *Biochem. J.*  
333 110(4):783-788.
- 334 34. Brion P & Westhof E (1997) Hierarchy and dynamics of RNA folding. *Annu. Rev. Biophys.*  
335 *Biomol. Struct.* 26:113-137.
- 336 35. Tinoco I, Jr. & Bustamante C (1999) How RNA folds. *J. Mol. Biol.* 293(2):271-281.
- 337 36. Bock CW, Katz AK, Markham GD, & Glusker JP (1999) Manganese as a replacement for  
338 magnesium and zinc: functional comparison of the divalent ions. *J. Amer. Chem. Soc.*  
339 121(32):7360-7372.
- 340 37. Imlay JA (2014) The mismetallation of enzymes during oxidative stress. *J. Biol. Chem.*  
341 289(41):28121-28128.
- 342 38. Zheng H, Shabalin IG, Handing KB, Bujnicki JM, & Minor W (2015) Magnesium-binding  
343 architectures in RNA crystal structures: validation, binding preferences, classification and motif  
344 detection. *Nucleic Acids Res.* 43(7):3789-3801.
- 345 39. Bowman JC, Lenz TK, Hud NV, & Williams LD (2012) Cations in charge: magnesium ions in  
346 RNA folding and catalysis. *Curr. Opin. Struct. Biol.* 22(3):262-272.
- 347 40. Hensley MP, Tierney DL, & Crowder MW (2011) Zn (II) binding to *Escherichia coli* 70S  
348 ribosomes. *Biochemistry* 50(46):9937-9939.
- 349 41. Honda K, *et al.* (2005) Ribosomal RNA in Alzheimer disease is oxidized by bound redox-active  
350 iron. *J. Biol. Chem.* 280(22):20978-20986.
- 351 42. Craine J & Peterkofsky A (1976) Studies on arginyl-tRNA synthetase from *Escherichia coli* B.  
352 Dual role of metals in enzyme catalysis. *J. Biol. Chem.* 251(1):241-246.
- 353 43. Ito Y, Tomasselli AG, & Noda LH (1980) ATP: AMP phosphotransferase from baker's yeast:  
354 purification and properties. *Eur. J. Biochem.* 105(1):85-92.
- 355 44. Da Silva JF & Williams RJP (2001) *The Biological Chemistry of the Elements: the Inorganic*  
356 *Chemistry of Life* (Oxford University Press) Second Ed.
- 357 45. Daly MJ, *et al.* (2004) Accumulation of Mn(II) in *Deinococcus radiodurans* facilitates gamma-  
358 radiation resistance. *Science* 306(5698):1025-1028.
- 359 46. Outten CE & O'Halloran TV (2001) Femtomolar sensitivity of metalloregulatory proteins  
360 controlling zinc homeostasis. *Science* 292(5526):2488-2492.
- 361 47. Beauchene NA, *et al.* (2017) O<sub>2</sub> availability impacts iron homeostasis in *Escherichia coli*. *Proc.*  
362 *Natl. Acad. Sci.* 14 (46):12261-12266.
- 363 48. Shimizu Y, *et al.* (2001) Cell-free translation reconstituted with purified components. *Nature*  
364 *Biotechnol.* 19(8):751.
- 365 49. Ban N, Nissen P, Hansen J, Moore PB, & Steitz TA (2000) The complete atomic structure of the  
366 large ribosomal subunit at 2.4 Å resolution. *Science* 289(5481):905-920.
- 367 50. Keedy HE, Thomas EN, & Zaher HS (2018) Decoding on the ribosome depends on the structure  
368 of the mRNA phosphodiester backbone. *Proc Natl Acad Sci*:DOI: 10.1073/pnas.1721431115.
- 369 51. Kjeldgaard M, Nissen P, Thirup S, & Nyborg J (1993) The crystal structure of elongation factor  
370 EF-Tu from *Thermus aquaticus* in the GTP conformation. *Structure* 1(1):35-50.
- 371 52. Campuzano S & Modolell J (1981) Effects of antibiotics, N-Acetylaminoacyl-tRNA and other  
372 agents on the Elongation-Factor-Tu dependent and ribosome-dependent GTP hydrolysis  
373 promoted by 2'(3')-O-l-Phenylalanyladenosine. *Eur. J. Biochem.* 117(1):27-31.
- 374 53. Chen Y, Feng S, Kumar V, Ero R, & Gao Y-G (2013) Structure of EF-G-ribosome complex in a  
375 pretranslocation state. *Nature Struct. Mol. Biol.* 20(9):1077.

- 376 54. Lovgren TNE, Heinonen J, & Loftfield RB (1978) Mechanism of aminoacylation of transfer  
377 ribonucleic-acid. Role of magnesium and spermine in synthesis of isoleucyl-transfer RNA. *J.*  
378 *Biol. Chem.* 253(19):6702-6710.
- 379 55. Thiebe R (1975) Aminoacylation of tRNA. Magnesium requirement and spermidine effect. *FEBS*  
380 *Lett.* 51(1-2):259-261.
- 381 56. Blanquet S, Dessen P, & Kahn D (1984) Properties and specificity of methionyl-tRNA<sup>fMet</sup>  
382 formyltransferase from *Escherichia coli*. *Methods Enzymol.* 106:141-152.
- 383 57. Morin L (1977) Creatine kinase: stability, inactivation, reactivation. *Clin. Chem.* 23(4):646-652.
- 384 58. Vasavada K, Kaplan J, & Rao BN (1984) Analysis of phosphorus-31 NMR spectra of enzyme-  
385 bound reactants and products of adenylate kinase using density matrix theory of chemical  
386 exchange. *Biochemistry* 23(5):961-968.
- 387 59. Munoz-Dorado J, Inouye S, & Inouye M (1990) Nucleoside diphosphate kinase from *Myxococcus*  
388 *xanthus*. II. Biochemical characterization. *J. Biol. Chem.* 265(5):2707-2712.
- 389 60. Kankare J, *et al.* (1994) The structure of *E. coli* soluble inorganic pyrophosphatase at 2.7 Å  
390 resolution. *Protein Eng. Des. Sel.* 7(7):823-830.
- 391 61. Bloch-Frankenthal L (1954) The role of magnesium in the hydrolysis of sodium pyrophosphate  
392 by inorganic pyrophosphatase. *Biochem. J.* 57(1):87.
- 393 62. Bernier CR, *et al.* (2014) RiboVision suite for visualization and analysis of ribosomes. *Faraday*  
394 *Disc* 169:195-207.

395

**Table 1. Structural and functional roles for select divalent cations in the translation system.** All biomolecules in the table have been shown to require  $Mg^{2+}$  and may also be active with  $Fe^{2+}$  or  $Mn^{2+}$ . “n.a.” indicates that data are not available.

| Translation system component(s) | Location of divalent ion                                            | Role of divalent cation                                         | Optimal $[Mg^{2+}]$ (mM) |
|---------------------------------|---------------------------------------------------------------------|-----------------------------------------------------------------|--------------------------|
| <b>Ribosome</b>                 |                                                                     |                                                                 |                          |
| LSU/SSU                         | $M^{2+}$ -rRNA clamps (11)                                          | Mediates and maintains folding/structure of rRNAs               | ~10 (31)                 |
| LSU                             | Dinuclear microclusters (12)                                        | Frames peptidyl transferase center (PTC)                        | ~10 (31)                 |
| LSU/SSU                         | LSU/SSU interface (24)                                              | Mediates docking of mRNA to SSU and association of SSU with LSU | ~10 (31)                 |
| SSU/mRNA                        | Critical bend in mRNA between the P-site and A-site codons (15, 50) | Maintains correct reading frame mRNA                            | ~10 (31)                 |
| A-site tRNA/<br>P-site tRNA     | tRNA-tRNA interface (24)                                            | Stabilize tRNAs in the PTC                                      | ~10 (31)                 |
| LSU/tRNA                        | rRNA-tRNA interface (24)                                            | Stabilize rRNA-tRNA in the PTC                                  | ~10 (31)                 |
| <b>Auxiliary</b>                |                                                                     |                                                                 |                          |
| EF-Tu                           | GTP binding site (51)                                               | Stabilizes the transition state                                 | 5-15 (52)                |
| EF-G                            | GTP binding site (53)                                               | Stabilizes the transition state                                 | n.a.                     |
| Aminoacyl-tRNA synthetases      | ATP binding site (54)                                               | Stabilizes the transition state                                 | >1 (55)                  |
| Methionyl-tRNA transformylase   | ATP binding site (56)                                               | Stabilizes the transition state                                 | 7 (56)                   |
| Creatine kinase                 | NTP binding site (57)                                               | Stabilizes the transition state                                 | ~5 (57)                  |
| Myokinase                       | Acceptor NDP binding site (58)                                      | Stabilizes the transition state                                 | ~3 (43)                  |
| Nucleoside-diphosphate kinase   | NTP binding site (59)                                               | Stabilizes the transition state                                 | >1                       |
| Pyrophosphatase                 | Active site (60)                                                    | Stabilizes the transition state                                 | >7 (61)                  |

## 397 **Figure Legends**

398

399 **Fig. 1.** Divalent cations serve many structural and functional roles in the ribosome.  $Mg^{2+}$  ions: **a)** form  
400 bidentate clamps with adjacent phosphate groups of rRNA (beige carbon atoms), **b)** form dinuclear  
401 microclusters that frame the rRNA of the peptidyl transferase center, **c)** stabilize the LSU-SSU interface,  
402 **d)** stabilize a functional kink in mRNA (green), **e)** stabilize association of tRNA (teal) with 23S rRNA, and  
403 **f)** stabilize association of mRNA with 16S rRNA. Thick dashed lines are first shell RNA interactions of  
404  $Mg^{2+}$ . Dotted lines indicate second shell interactions. Images are of the *Thermus thermophilus* ribosome  
405 (PDB ID: 1VY4) because the structural information available for *T. thermophilus* ribosomes is more  
406 accurate than for *E. coli*. This figure was generated with the program RiboVision (62).

407 **Fig. 2.** SHAPE reactivities mapped onto the LSU rRNA secondary structure in **a)**  $Na^+$ , **b)**  $Na^+/Fe^{2+}$ , or **c)**  
408  $Na^+/Mg^{2+}$ . Key functional elements are labeled in panel a, and the scale in panel (a) applies to panels b and  
409 c. **d)**  $Fe^{2+}$ -induced changes ( $\Delta Fe^{2+}$ ) in SHAPE reactivity calculated by subtracting  $Na^+$  data from  $Na^+/Fe^{2+}$   
410 data for each nucleotide, and **e)**  $Mg^{2+}$ -induced changes ( $\Delta Mg^{2+}$ ) in SHAPE reactivity calculated by  
411 subtracting  $Na^+$  data from  $Na^+/Mg^{2+}$  data for each nucleotide. The scale shown for panel d also applies to  
412 panel e. Positive values indicate increased SHAPE reactivity in presence of the divalent cation, while  
413 negative values denote decreased reactivity. Regions where data are not available (5' and 3' ends) are grey.  
414 These figures were generated with the program RiboVision (62). *Thermus thermophilus* rRNA was used as  
415 the analytical model for SHAPE experiments because the structural information is more accurate than for  
416 *E. coli*. The L11 binding region, where the greatest discrepancy between  $Fe^{2+}$  and  $Mg^{2+}$  is observed, is  
417 indicated with an arrow.

418 **Fig. 3.**  $Mg^{2+}$  and  $Fe^{2+}$  stimulate translational activity over a range of concentrations. The activity of the  
419 translation product (dihydrofolate reductase, which catalyzes the oxidation of NADPH, with a maximum  
420 absorbance at 340 nm) was used as a proxy for protein production. Translation reactions were run for 120  
421 minutes. All translation reactions contained 2.5 mM background  $Mg^{2+}$ , to which varying amounts of  
422 additional  $Mg^{2+}$  or  $Fe^{2+}$  were added. The error bars for triplicate experiments (N=3) are plotted as the  
423 standard error of the mean.

424 **Fig. 4.**  $Fe^{2+}$  consistently supports 50-80% of the translational activity as  $Mg^{2+}$  when the translation  
425 experiments are run for 15-120 minutes. The activity of the translation product (dihydrofolate reductase,  
426 which catalyzes the oxidation of NADPH, with a maximum absorbance at 340 nm) was used as a proxy for  
427 protein production. All translation reactions contained 2.5 mM background  $Mg^{2+}$ , to which 7 mM additional  
428  $Mg^{2+}$  or  $Fe^{2+}$  were added, totaling to 9.5 mM divalent cation. The error bars for triplicate experiments (N=3)  
429 are plotted as the standard error of the mean.

430 **Fig. 5.**  $Mn^{2+}$  can support translation after removal of background  $Mg^{2+}$ . **a)** Reactions prepared with washed  
431 *E. coli* ribosomes, reducing the background  $Mg^{2+}$  to 1 mM, to which 7, 9, or 11 mM additional  $Mg^{2+}$ ,  $Fe^{2+}$ ,  
432 or  $Mn^{2+}$  were added, totaling 8, 10, or 12 mM divalent cation ( $M^{2+}$ ). **b)** Reactions prepared using washed  
433 *E. coli* ribosomes and washed factor mix, which reduced the background  $Mg^{2+}$  to the low  $\mu M$  level, to  
434 which 8, 10, or 12 mM additional,  $Mg^{2+}$ ,  $Fe^{2+}$ , or  $Mn^{2+}$  were added. The activity of the translation product  
435 (dihydrofolate reductase, which catalyzes the oxidation of NADPH, with a maximum absorbance at 340  
436 nm) was used as a proxy for protein production. The error bars for triplicate experiments (N=3) are plotted  
437 as the standard error of the mean.

438

a)  $Mg^{2+}$ -rRNA clamp

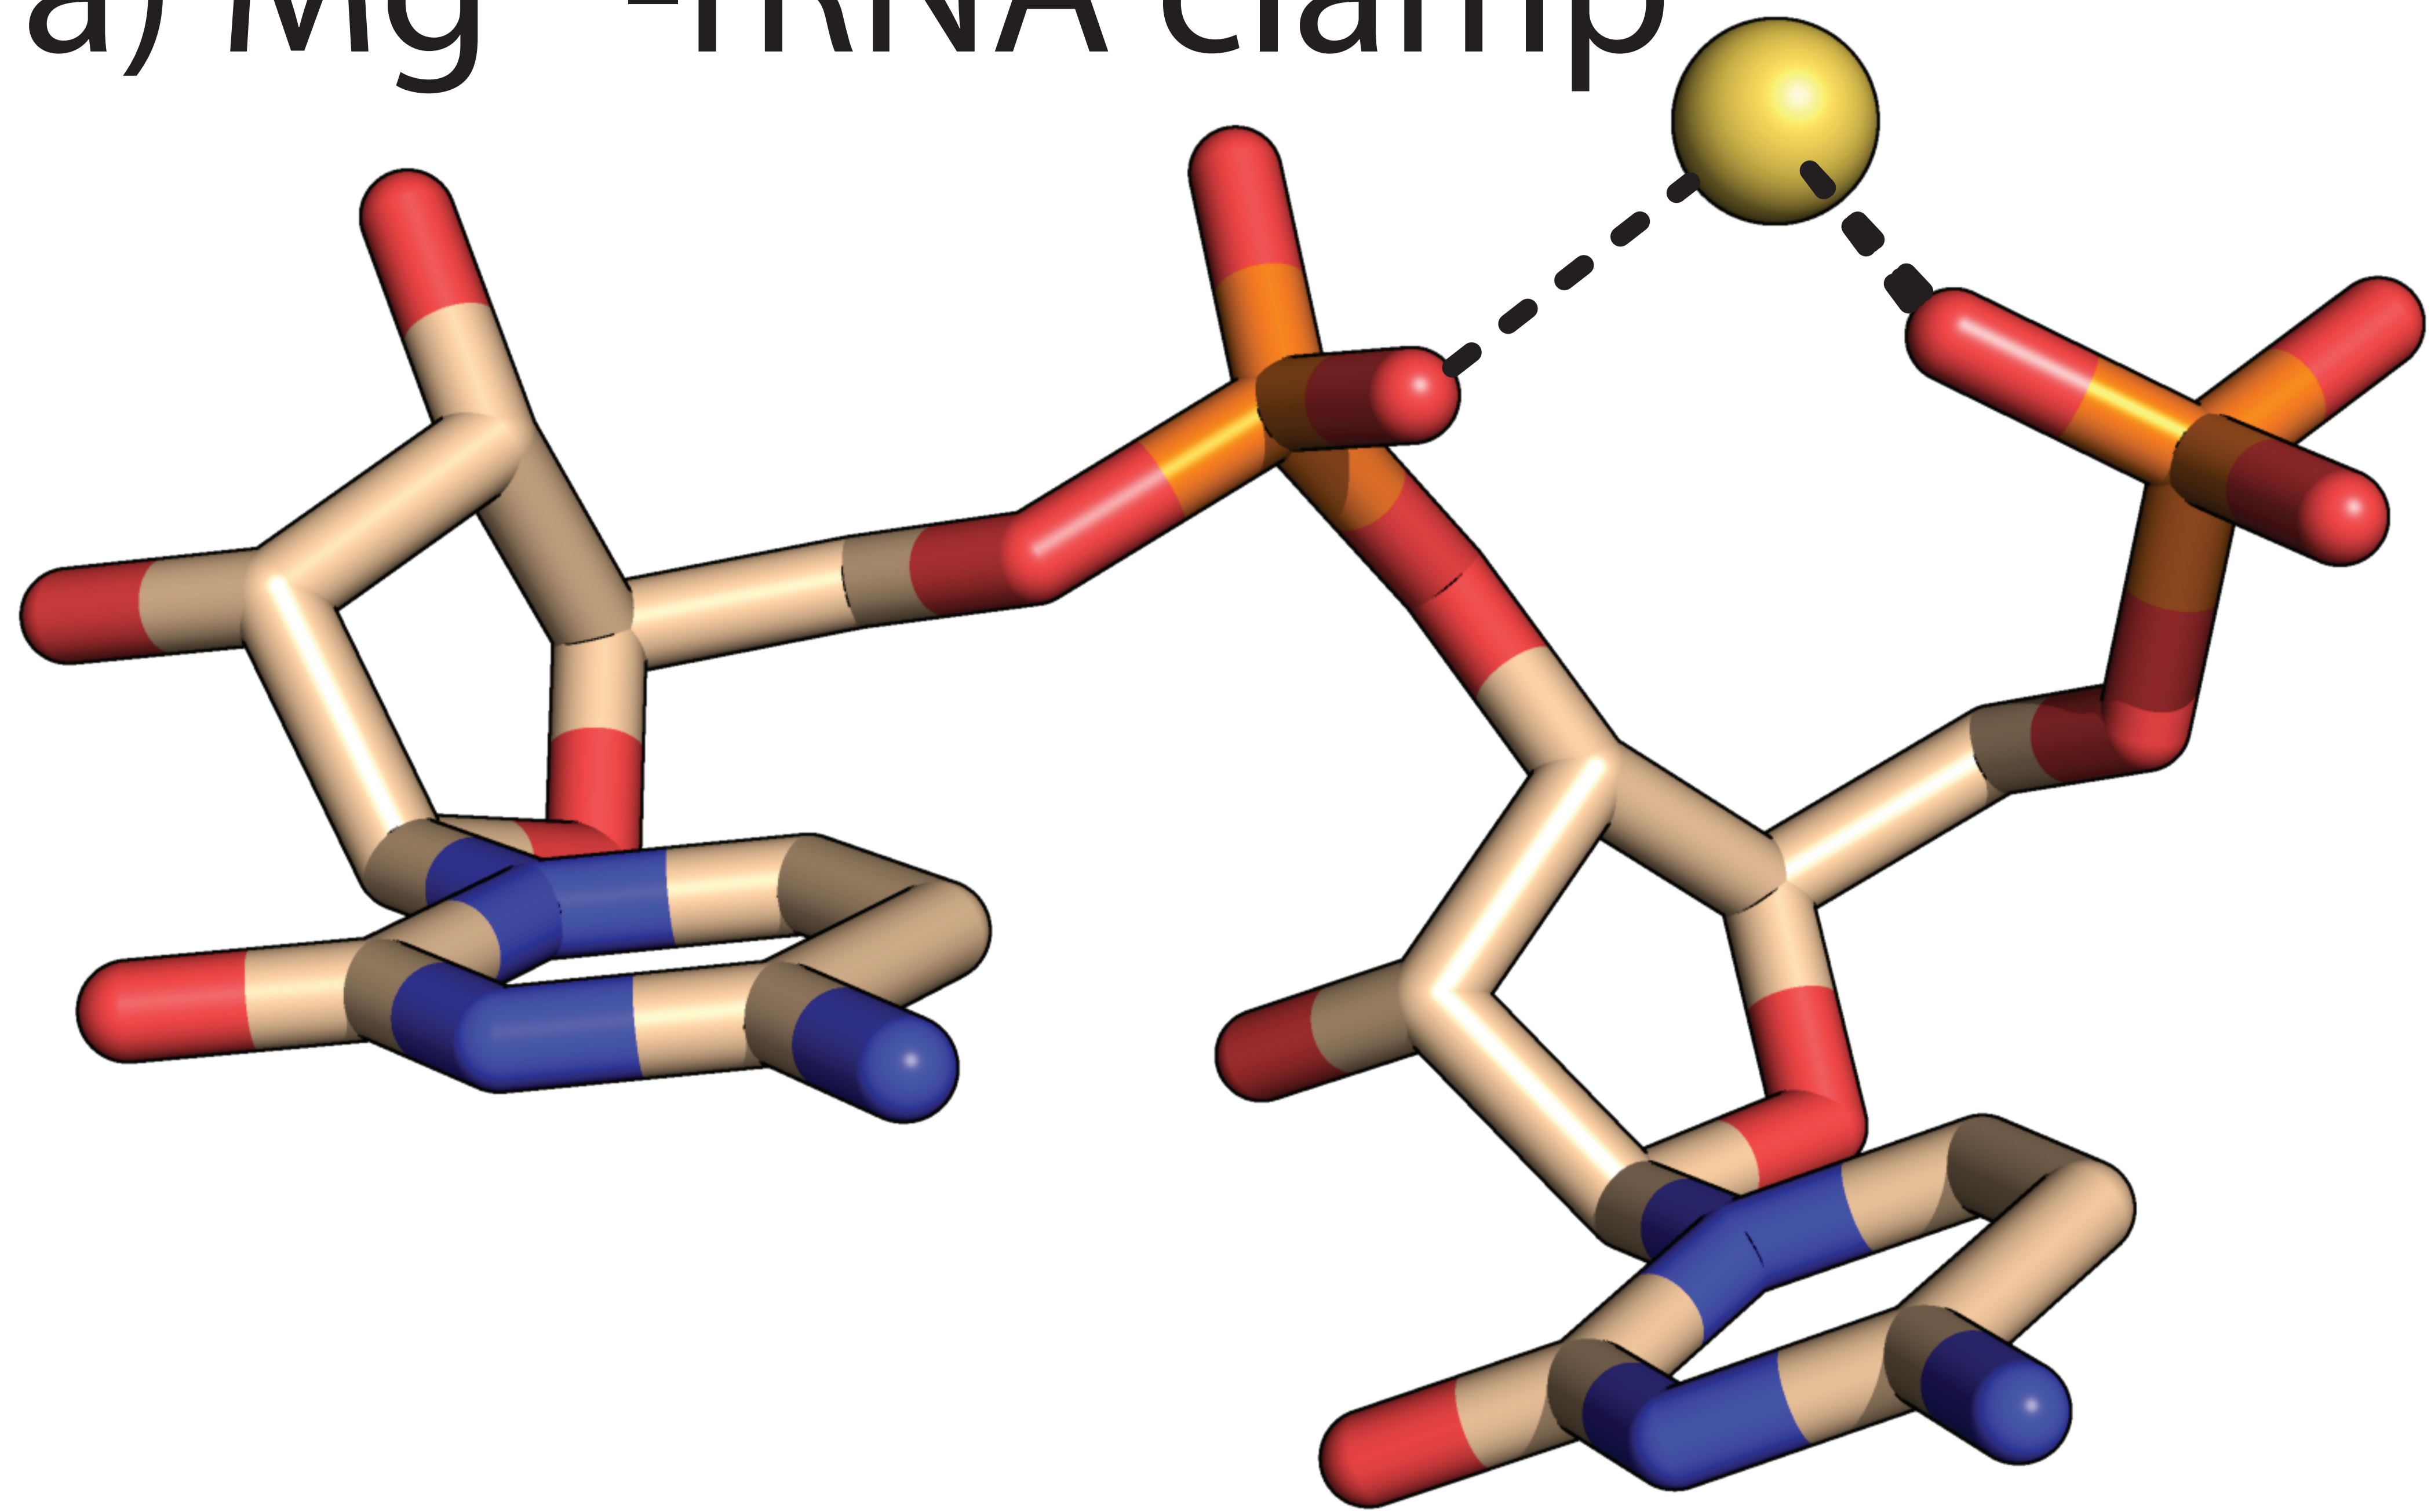

b) dinuclear microcluster

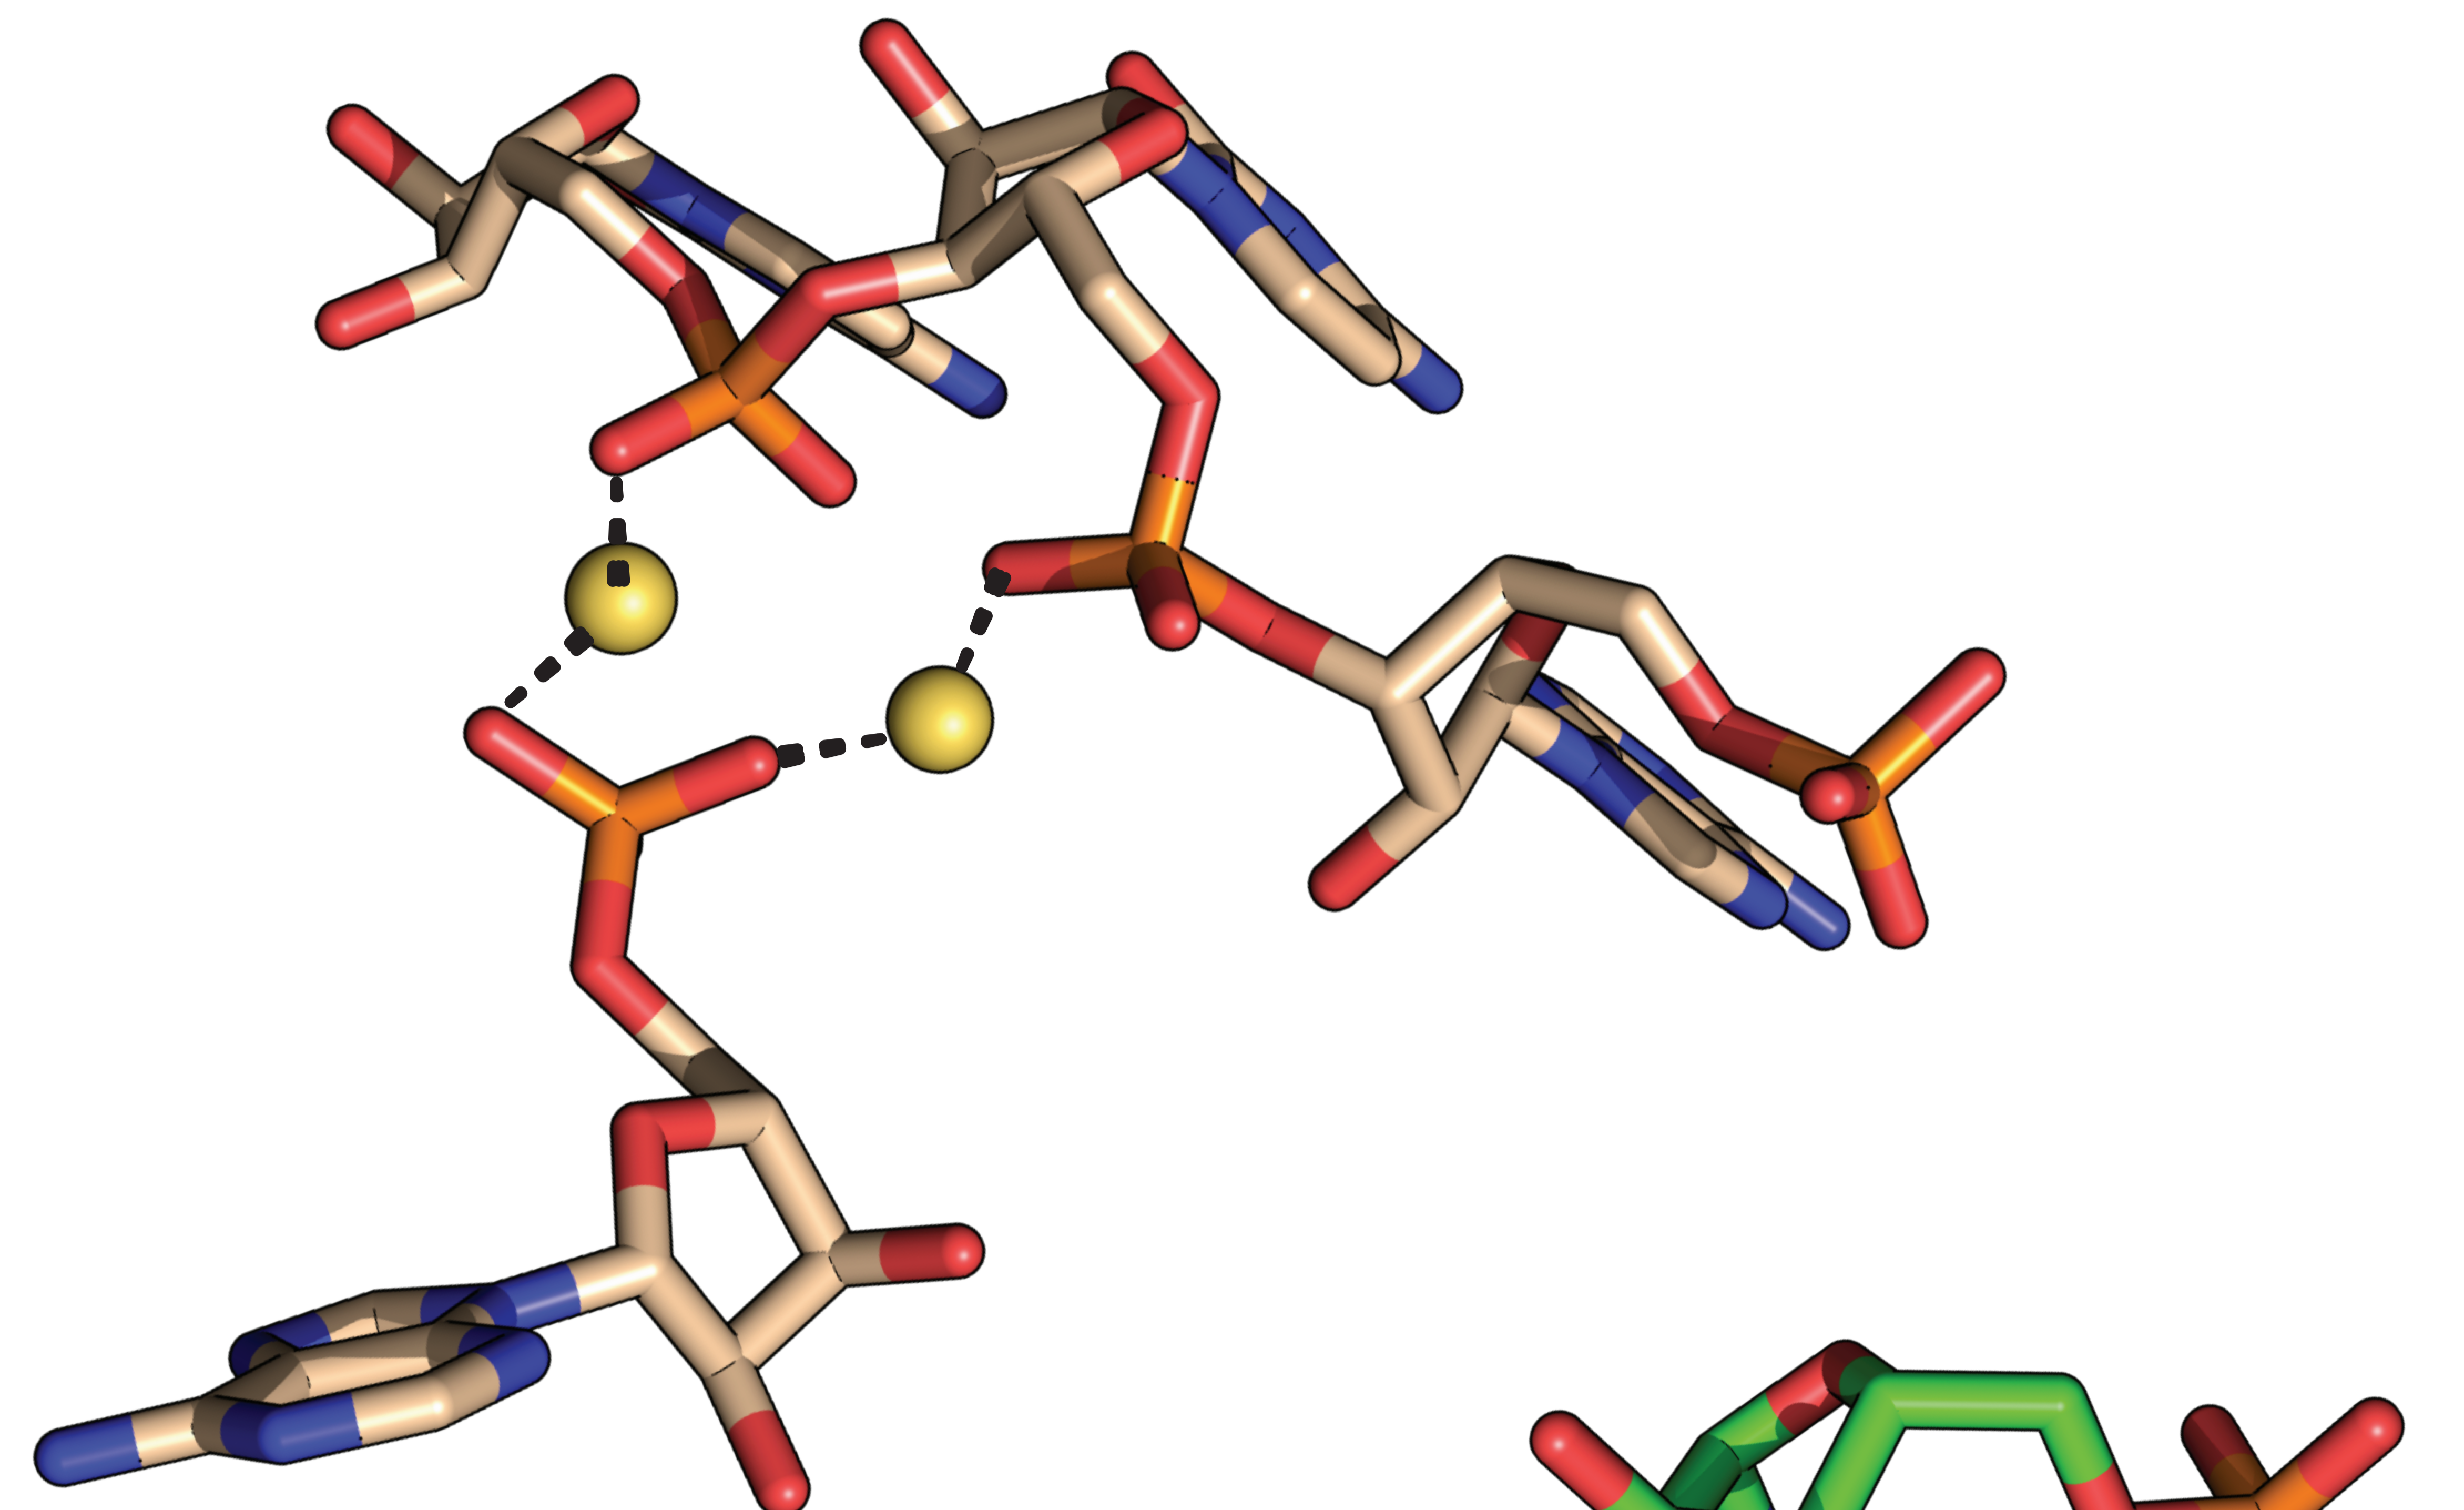

c) LSU-SSU interface

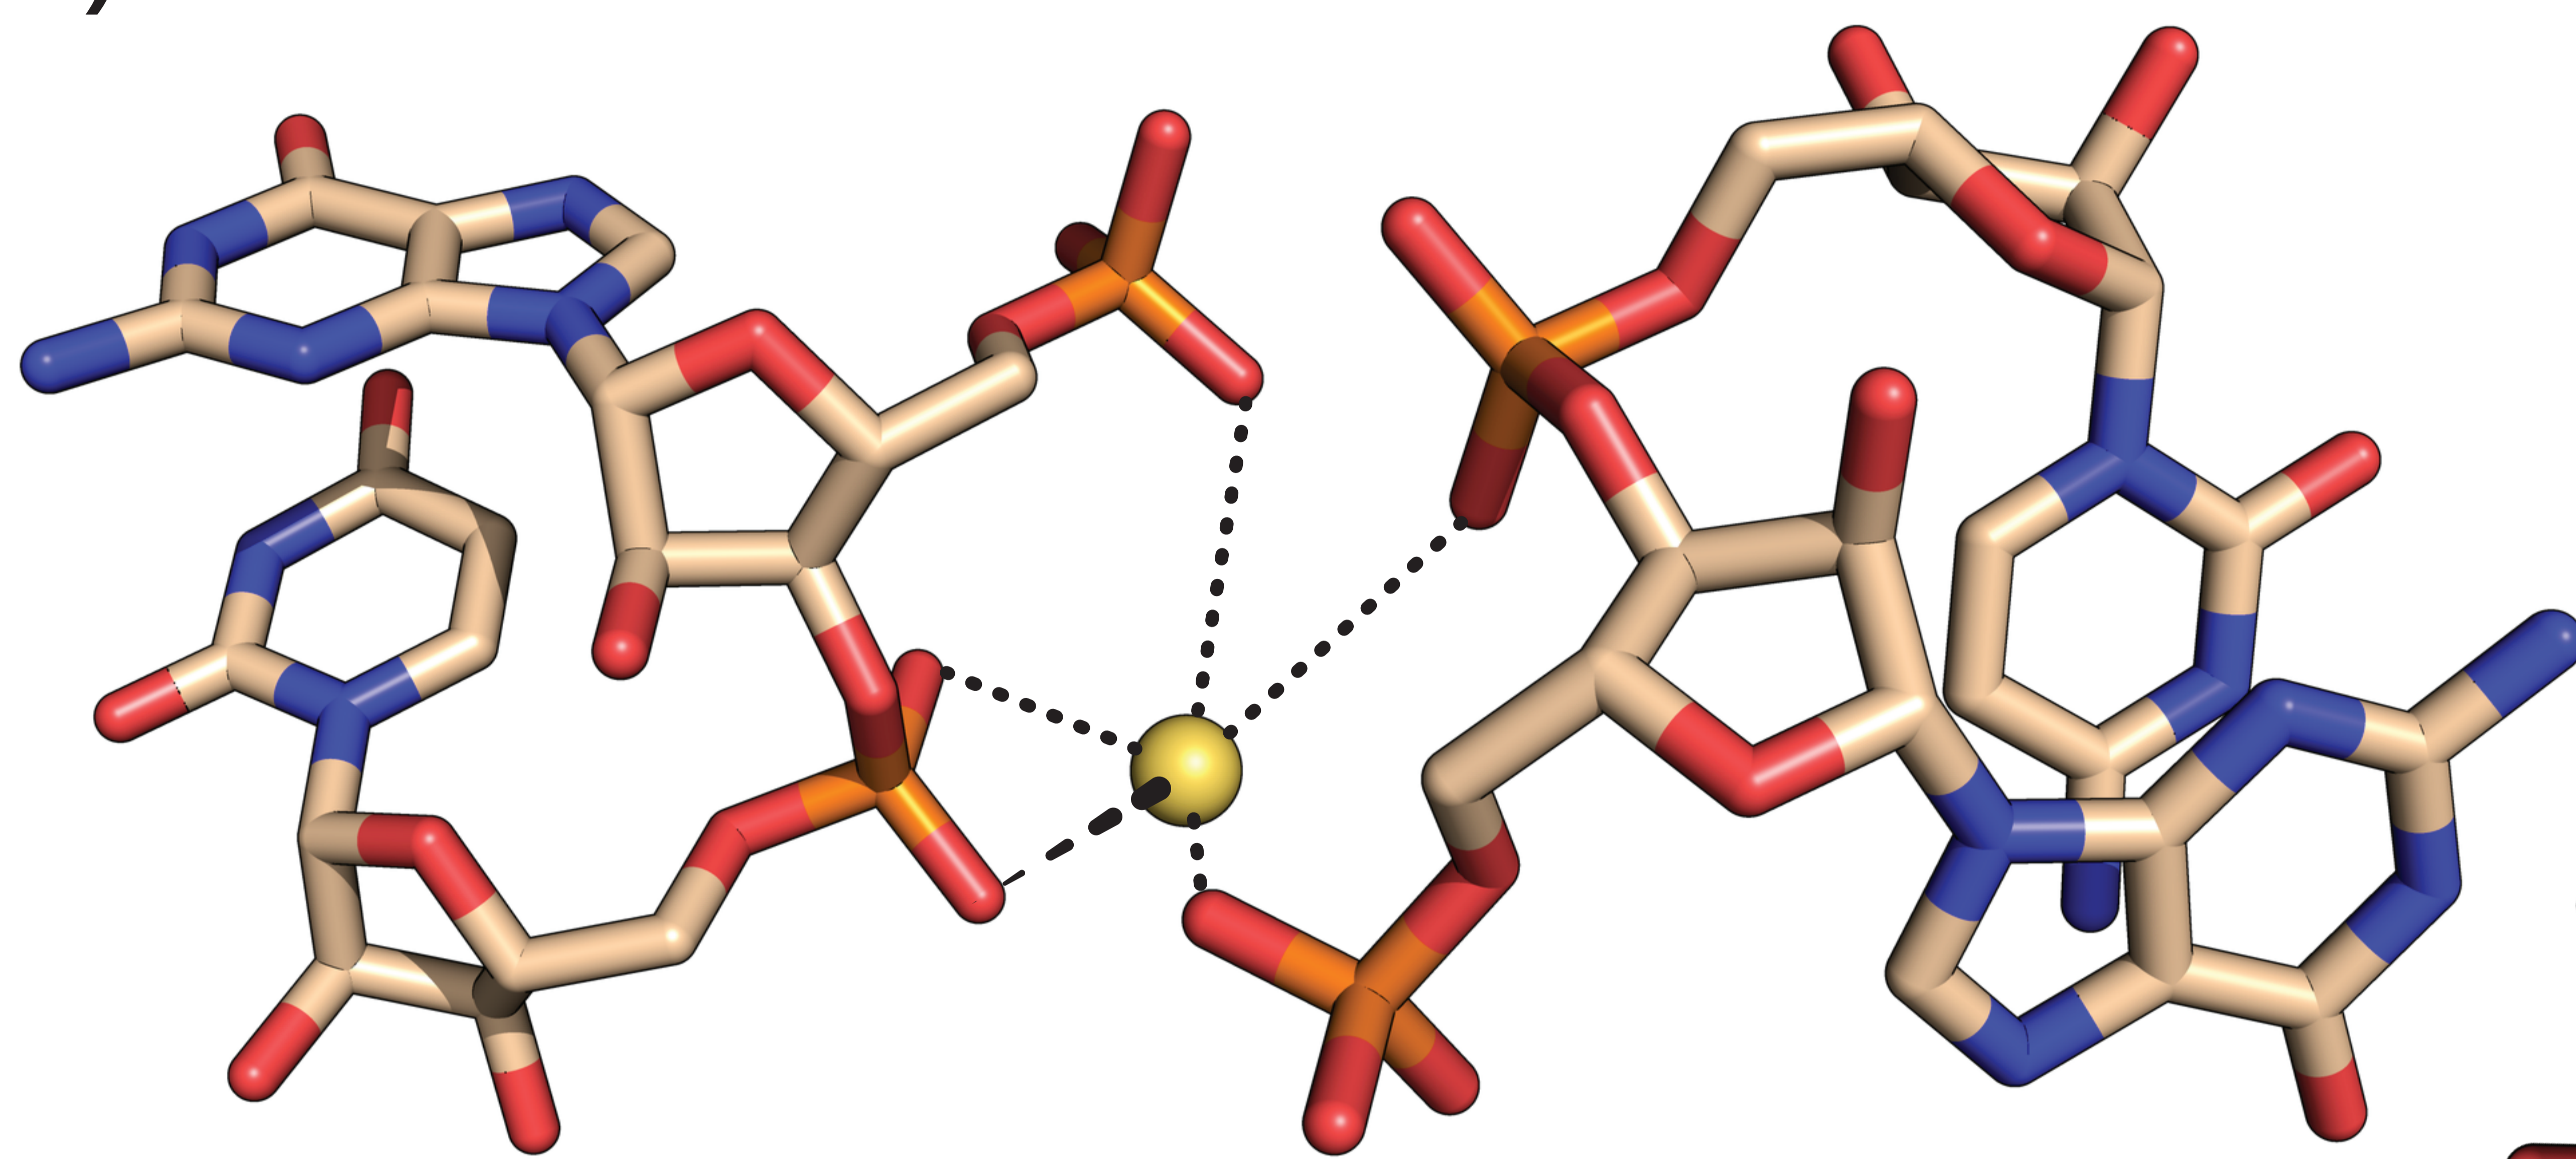

d) mRNA bend

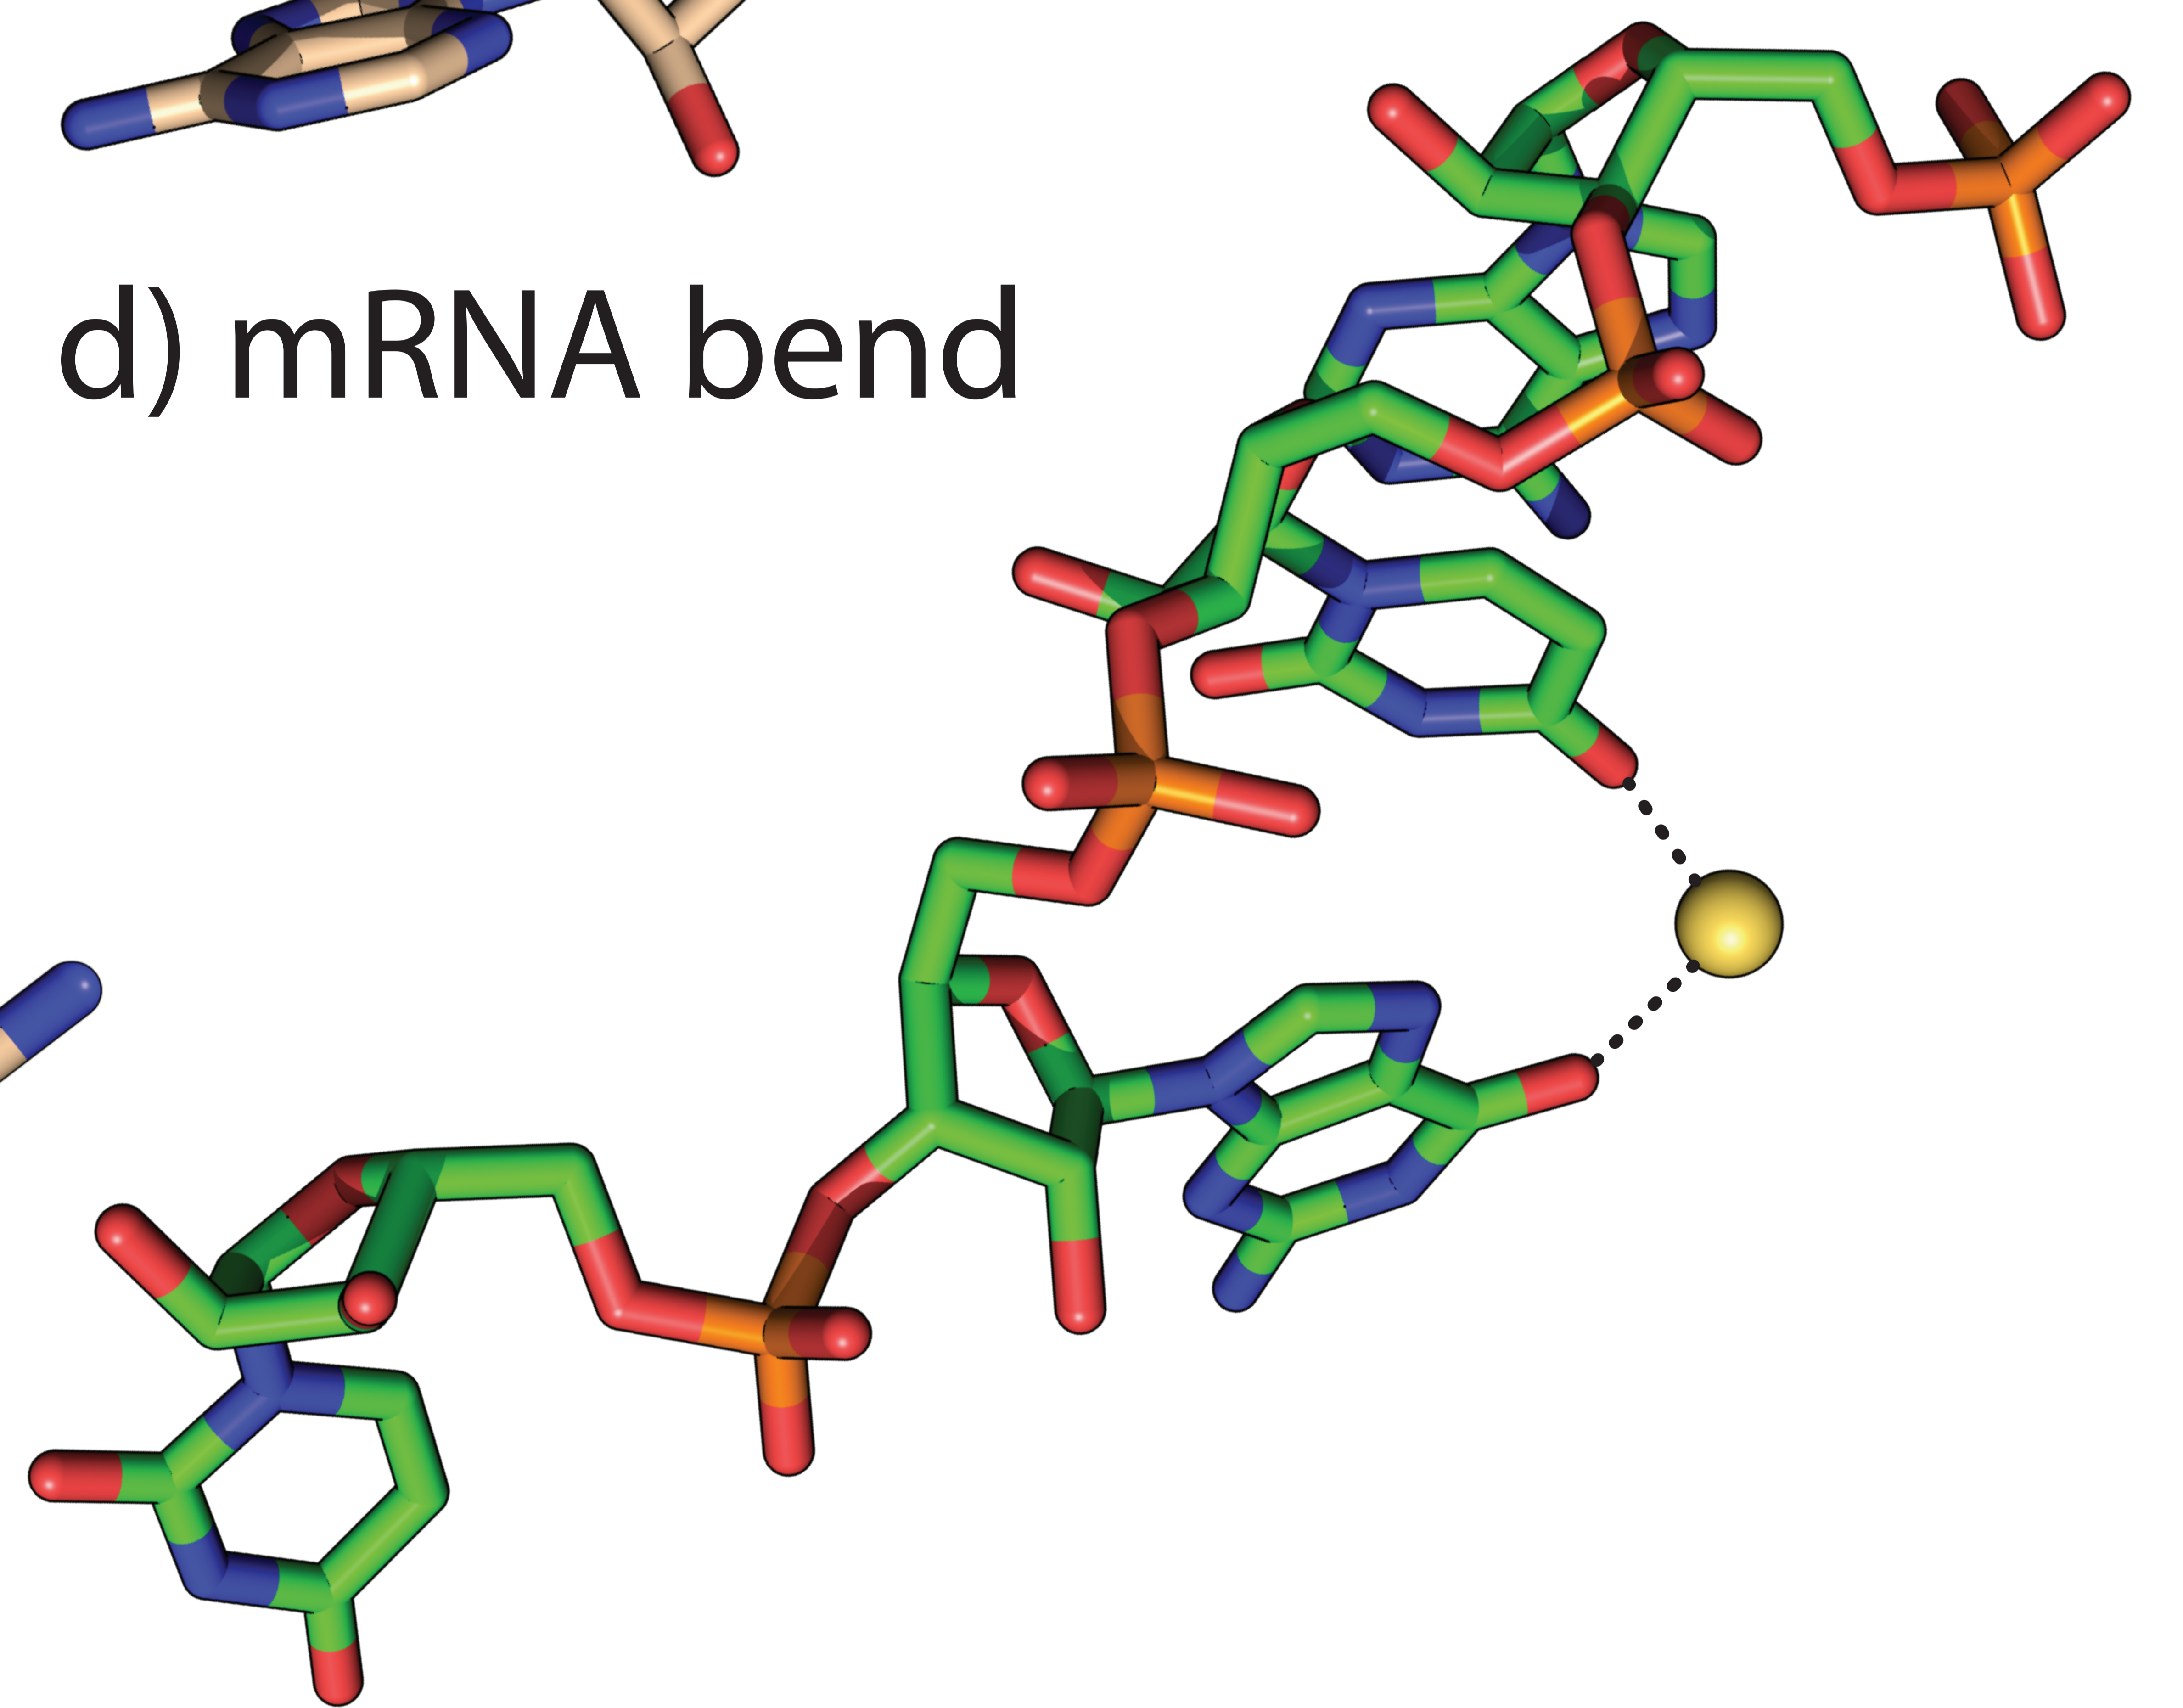

e) rRNA-tRNA interface

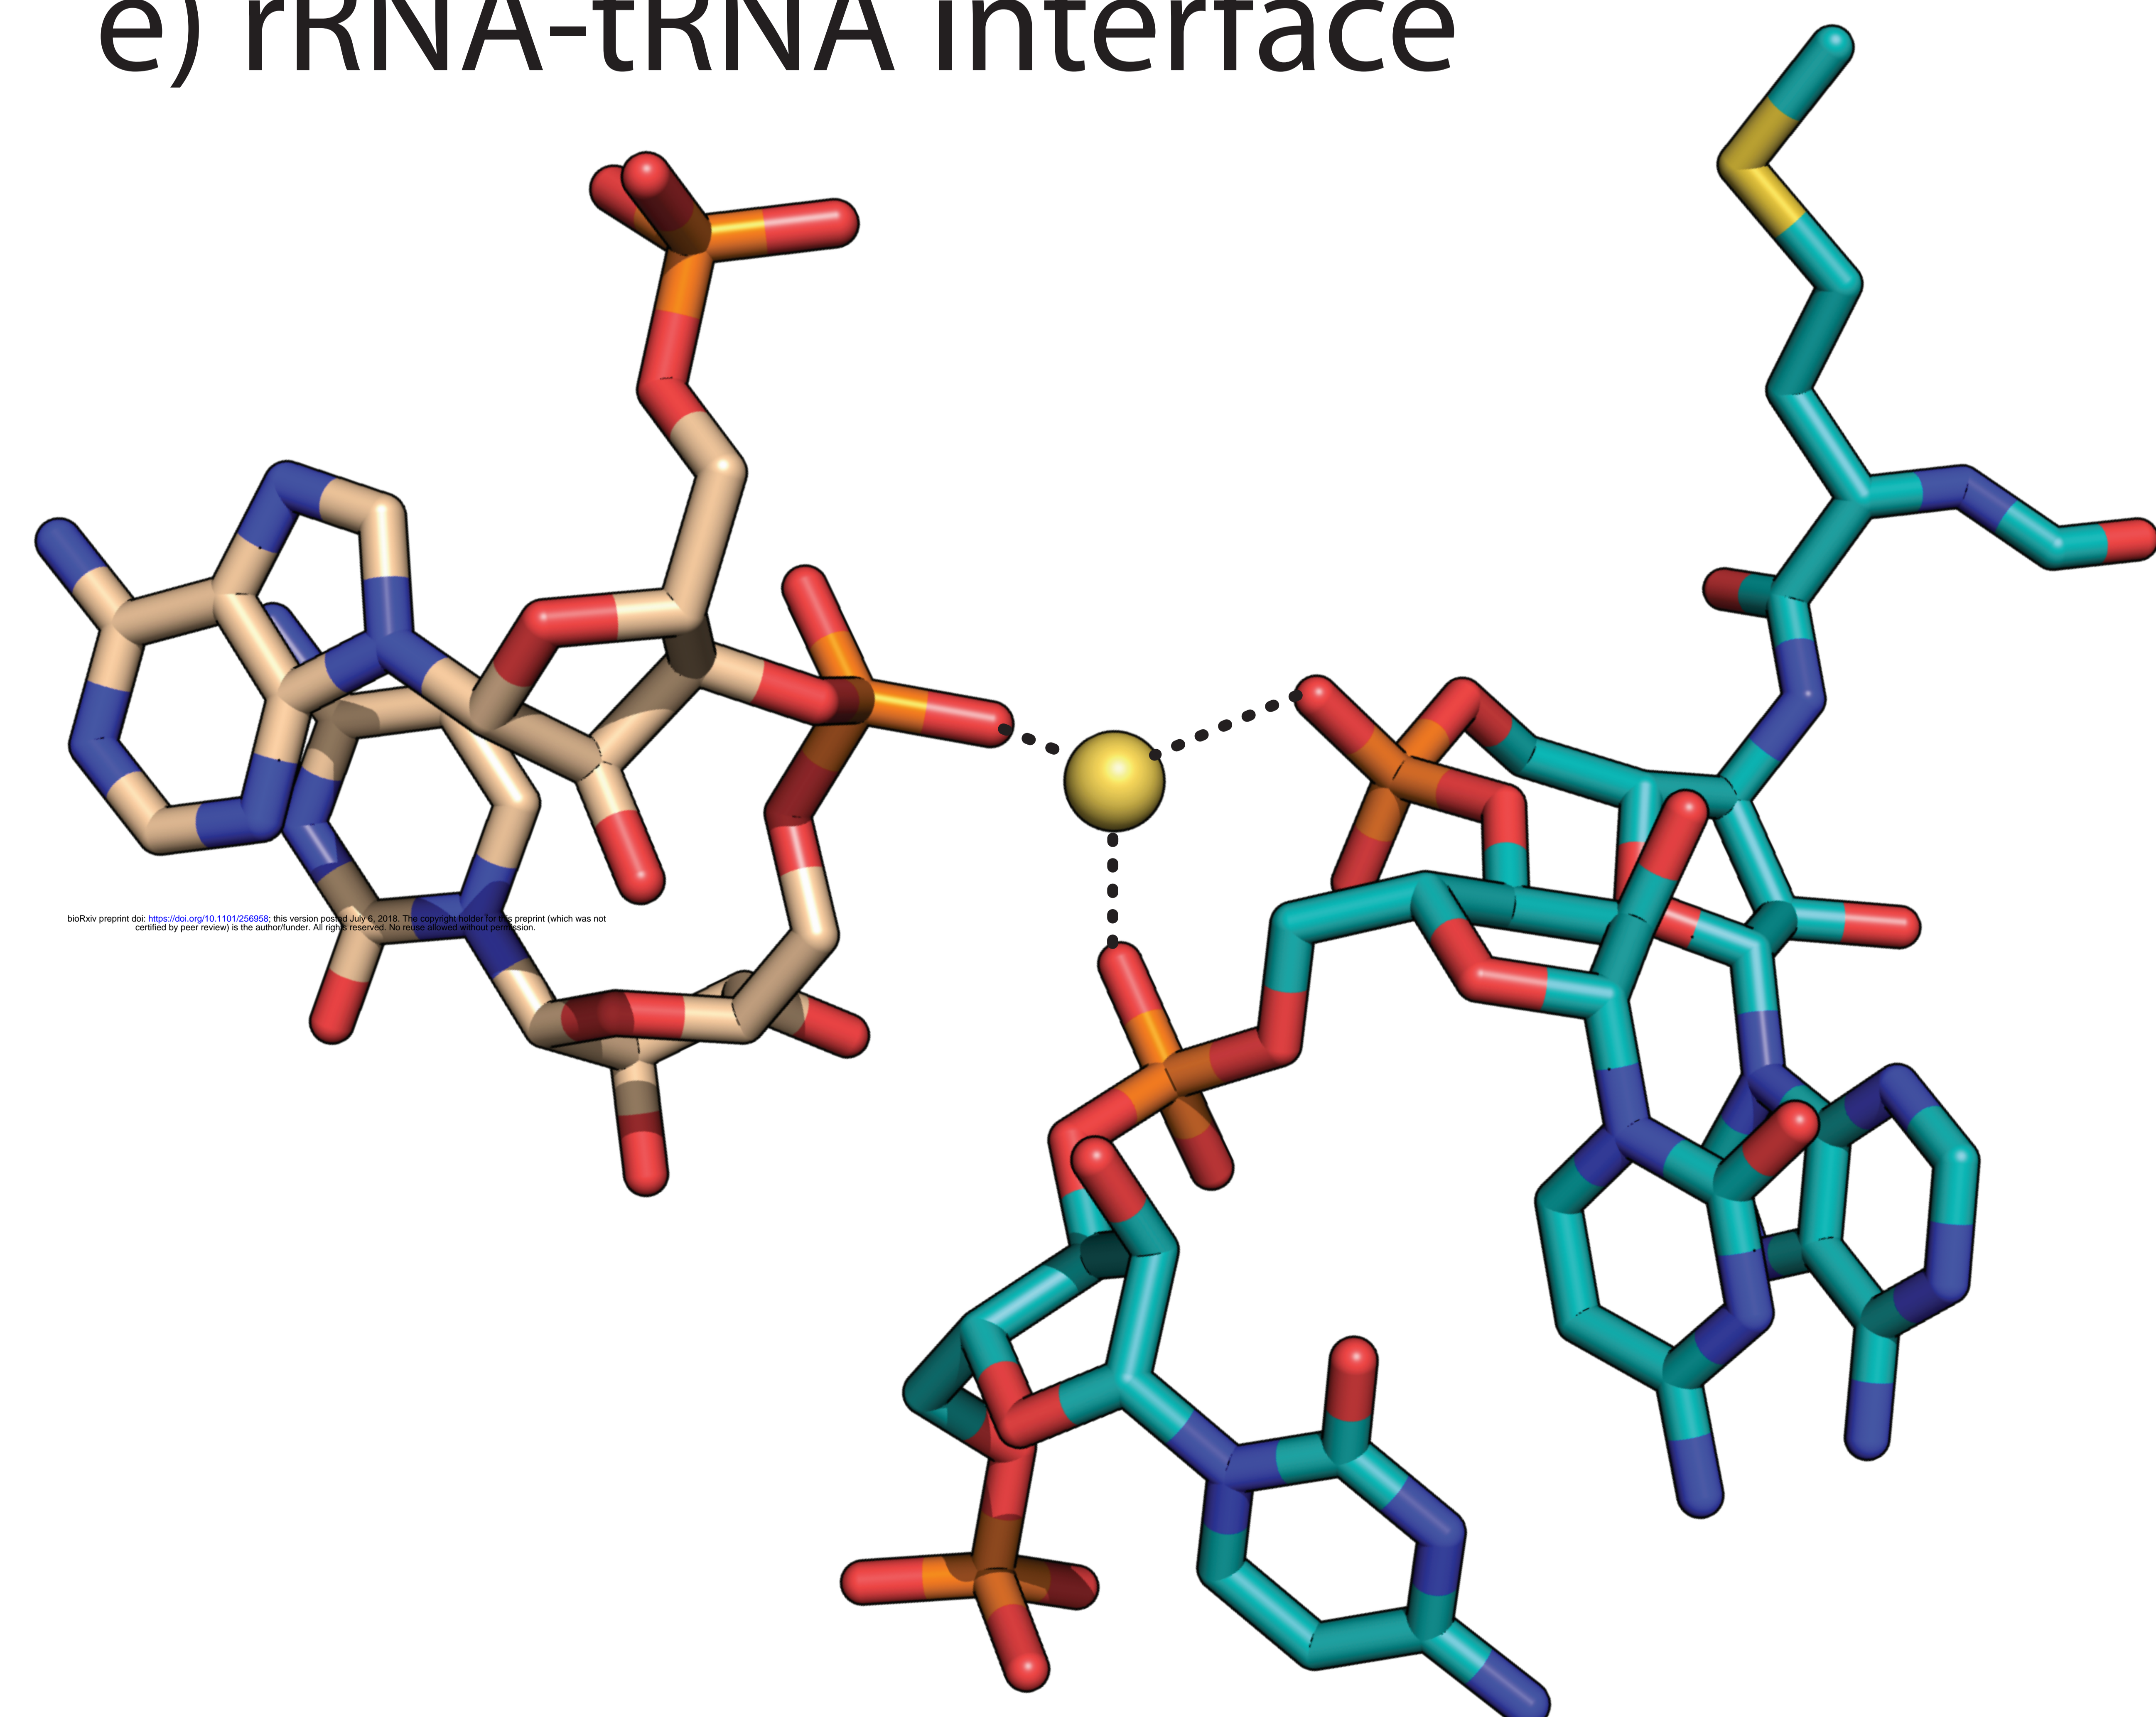

f) rRNA-mRNA interface

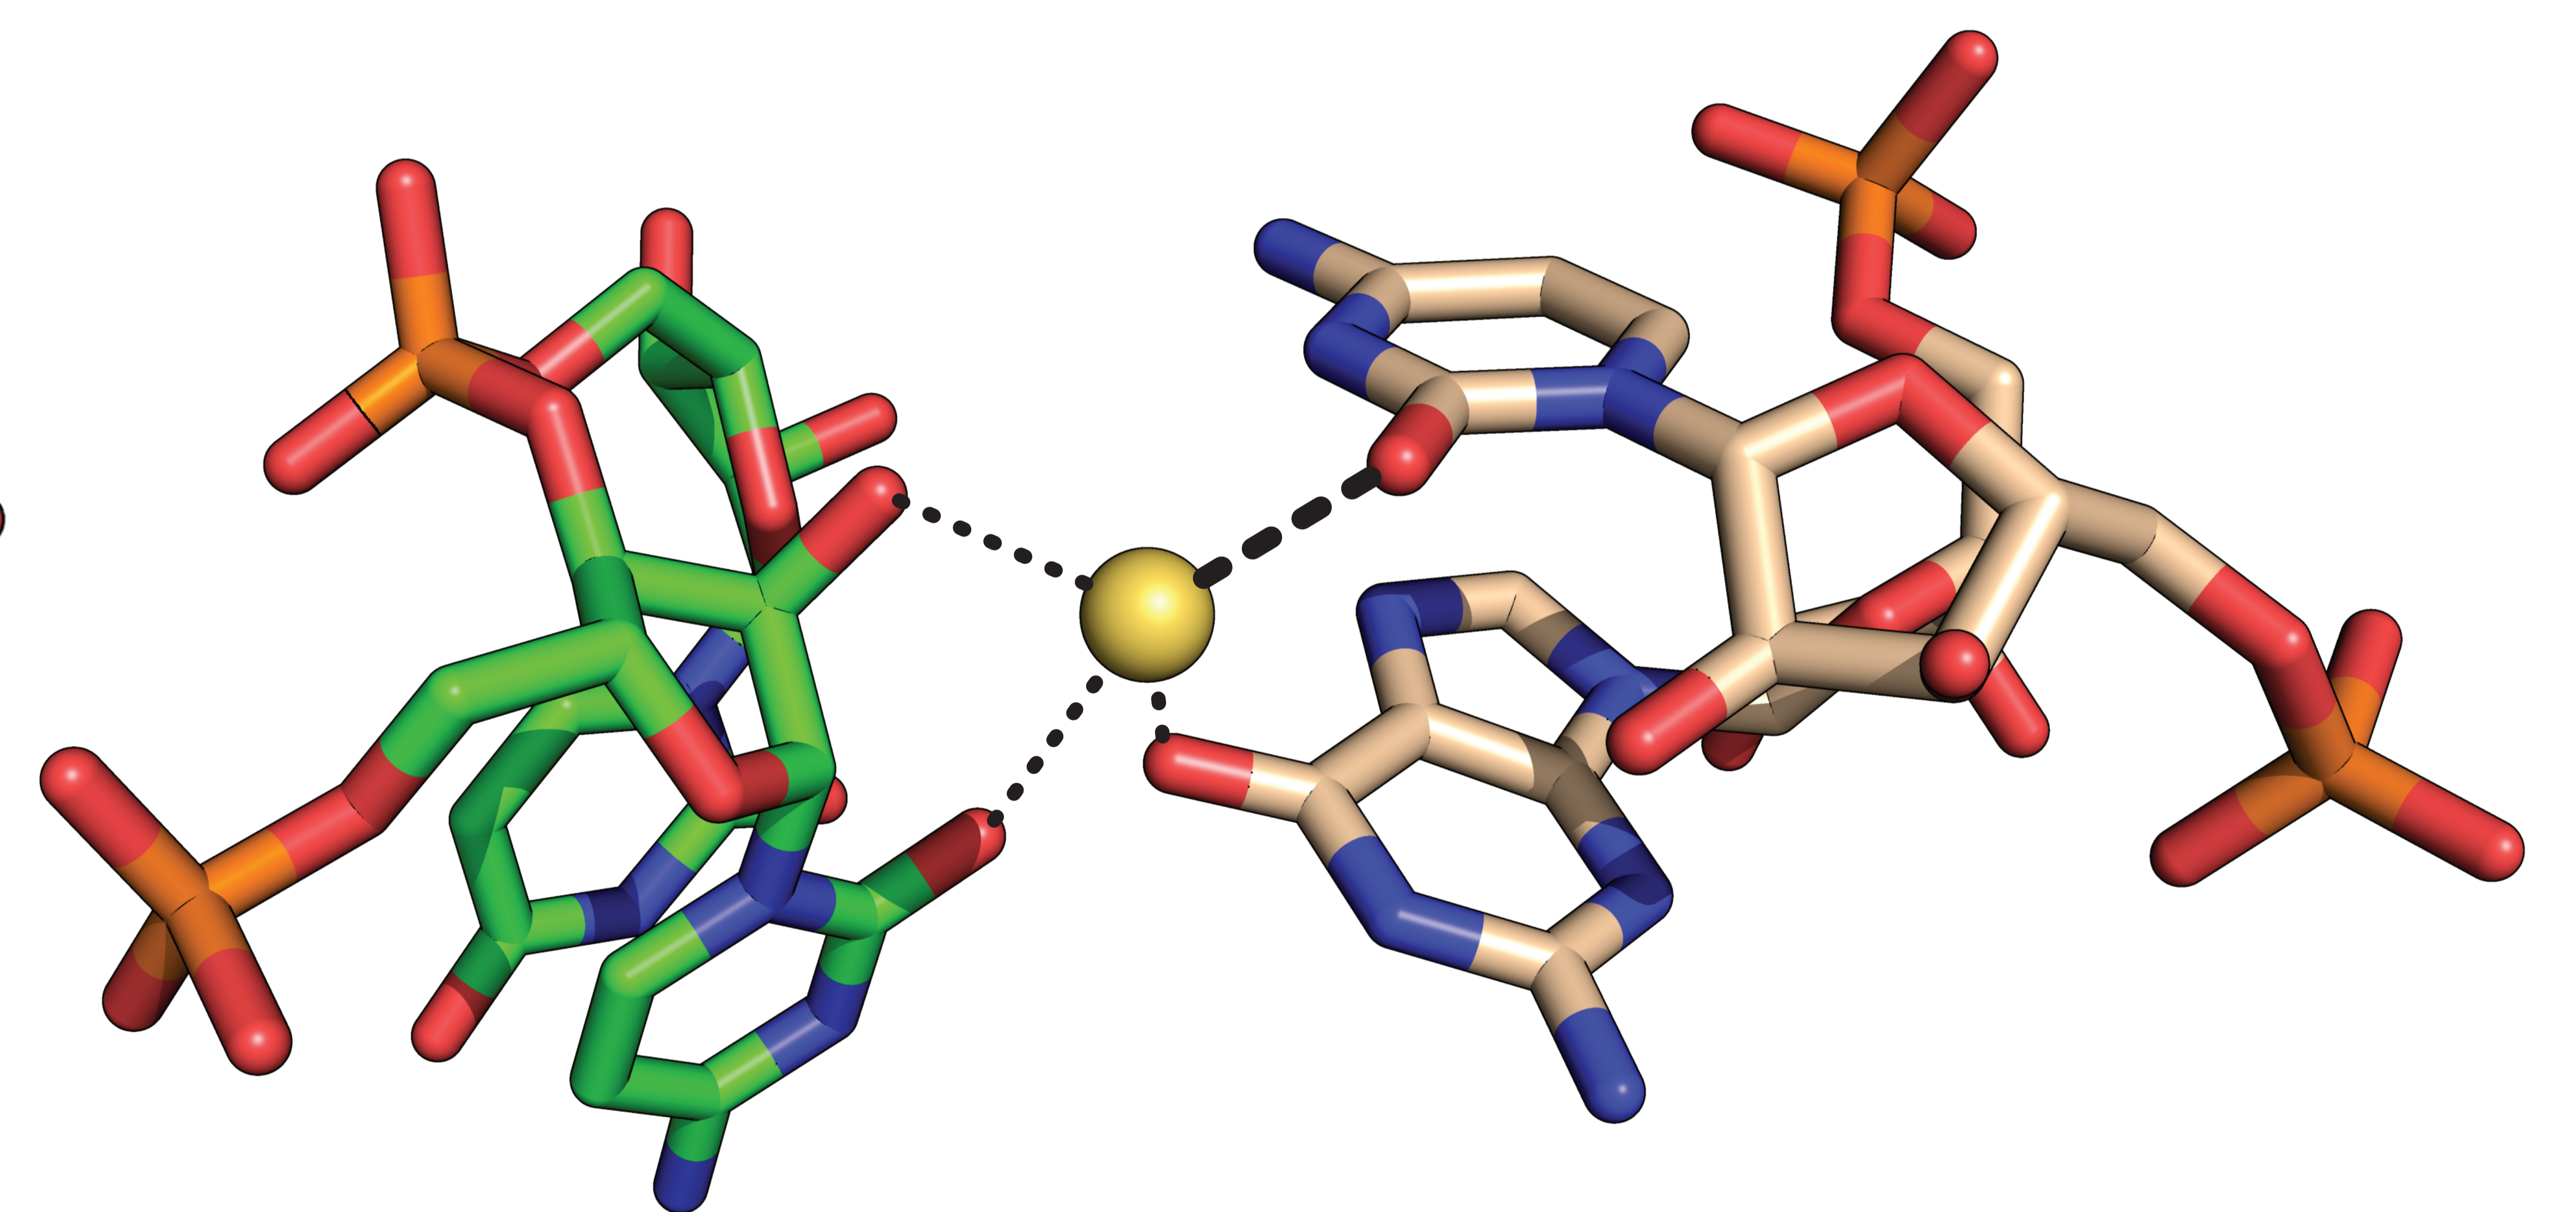

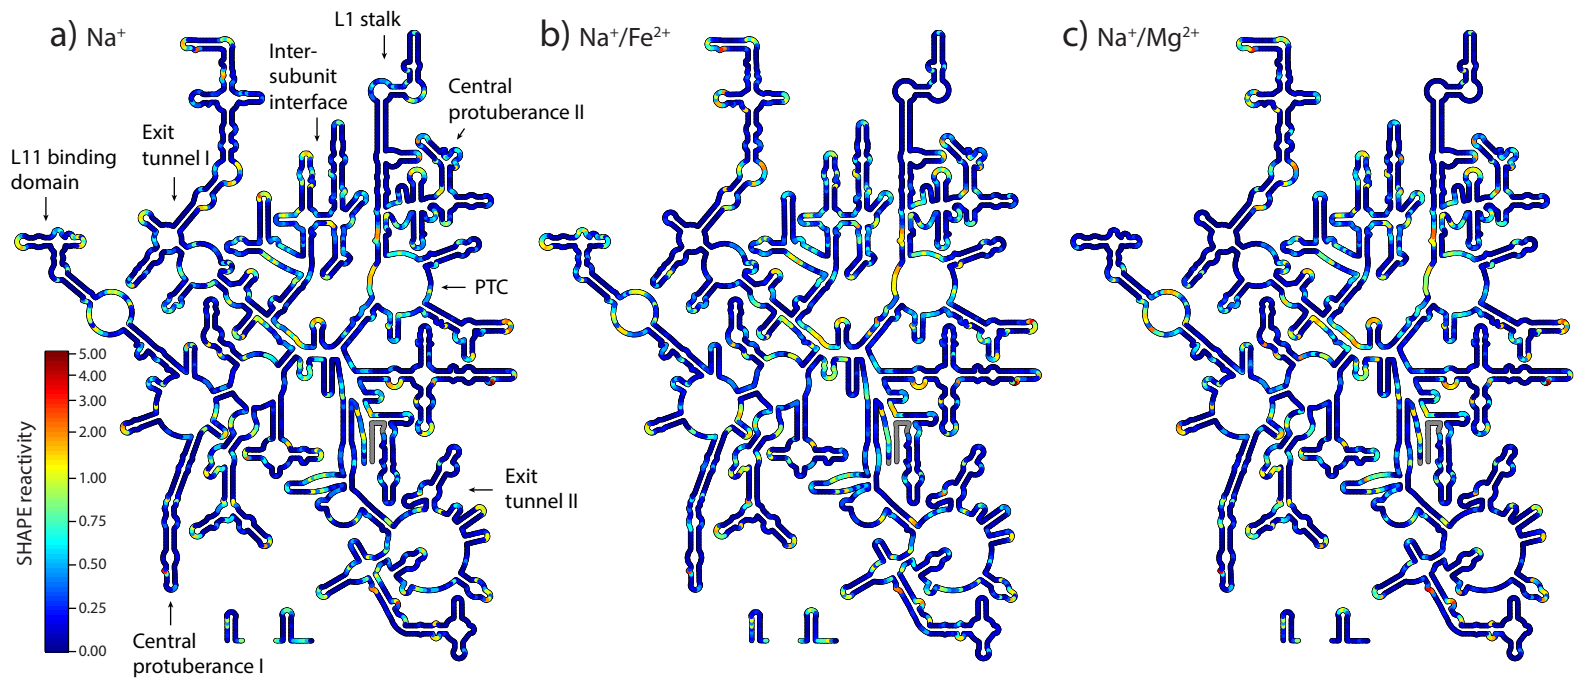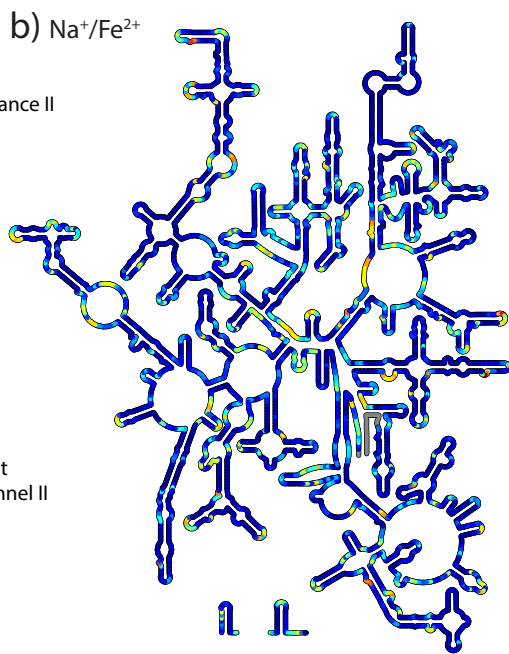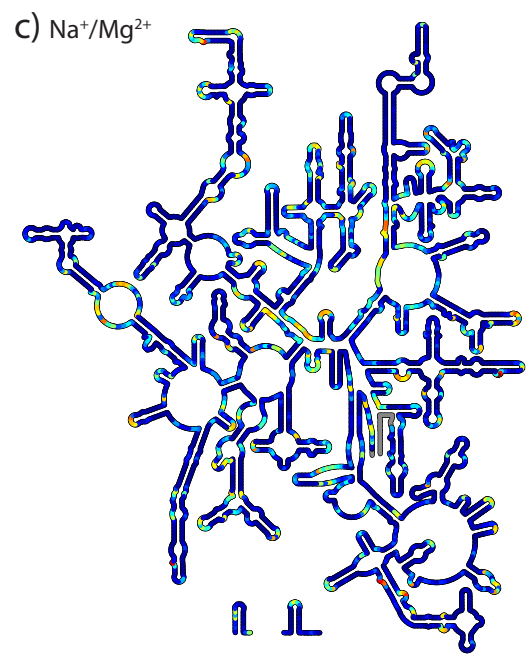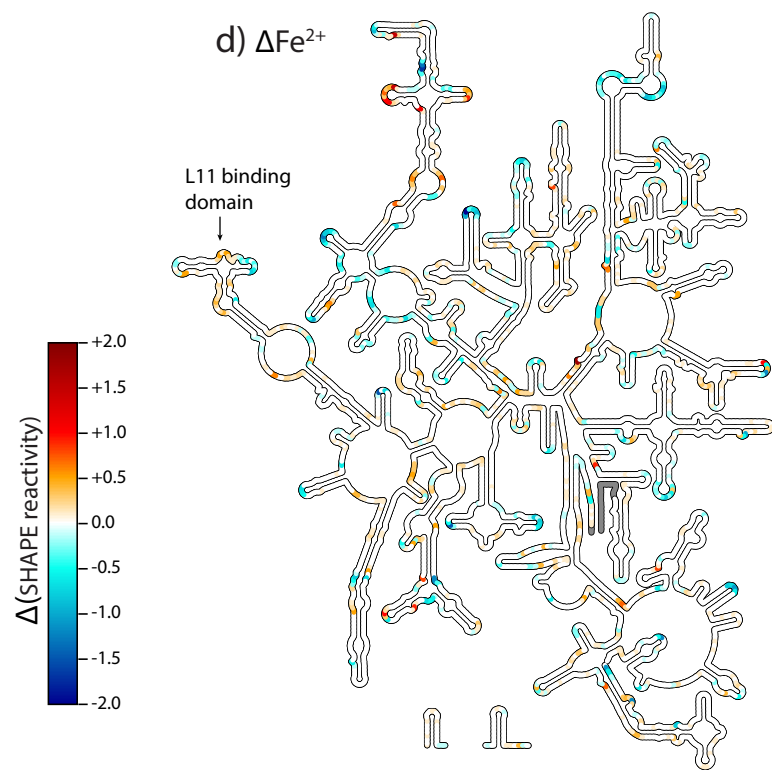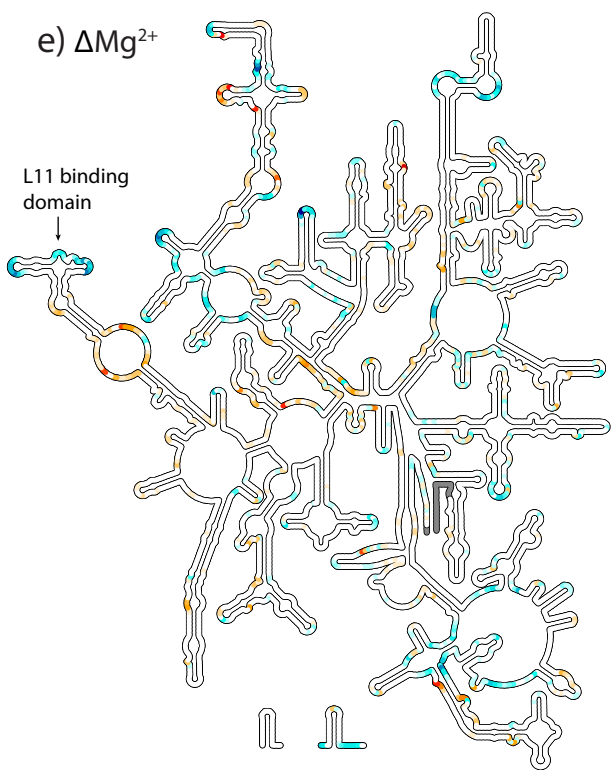

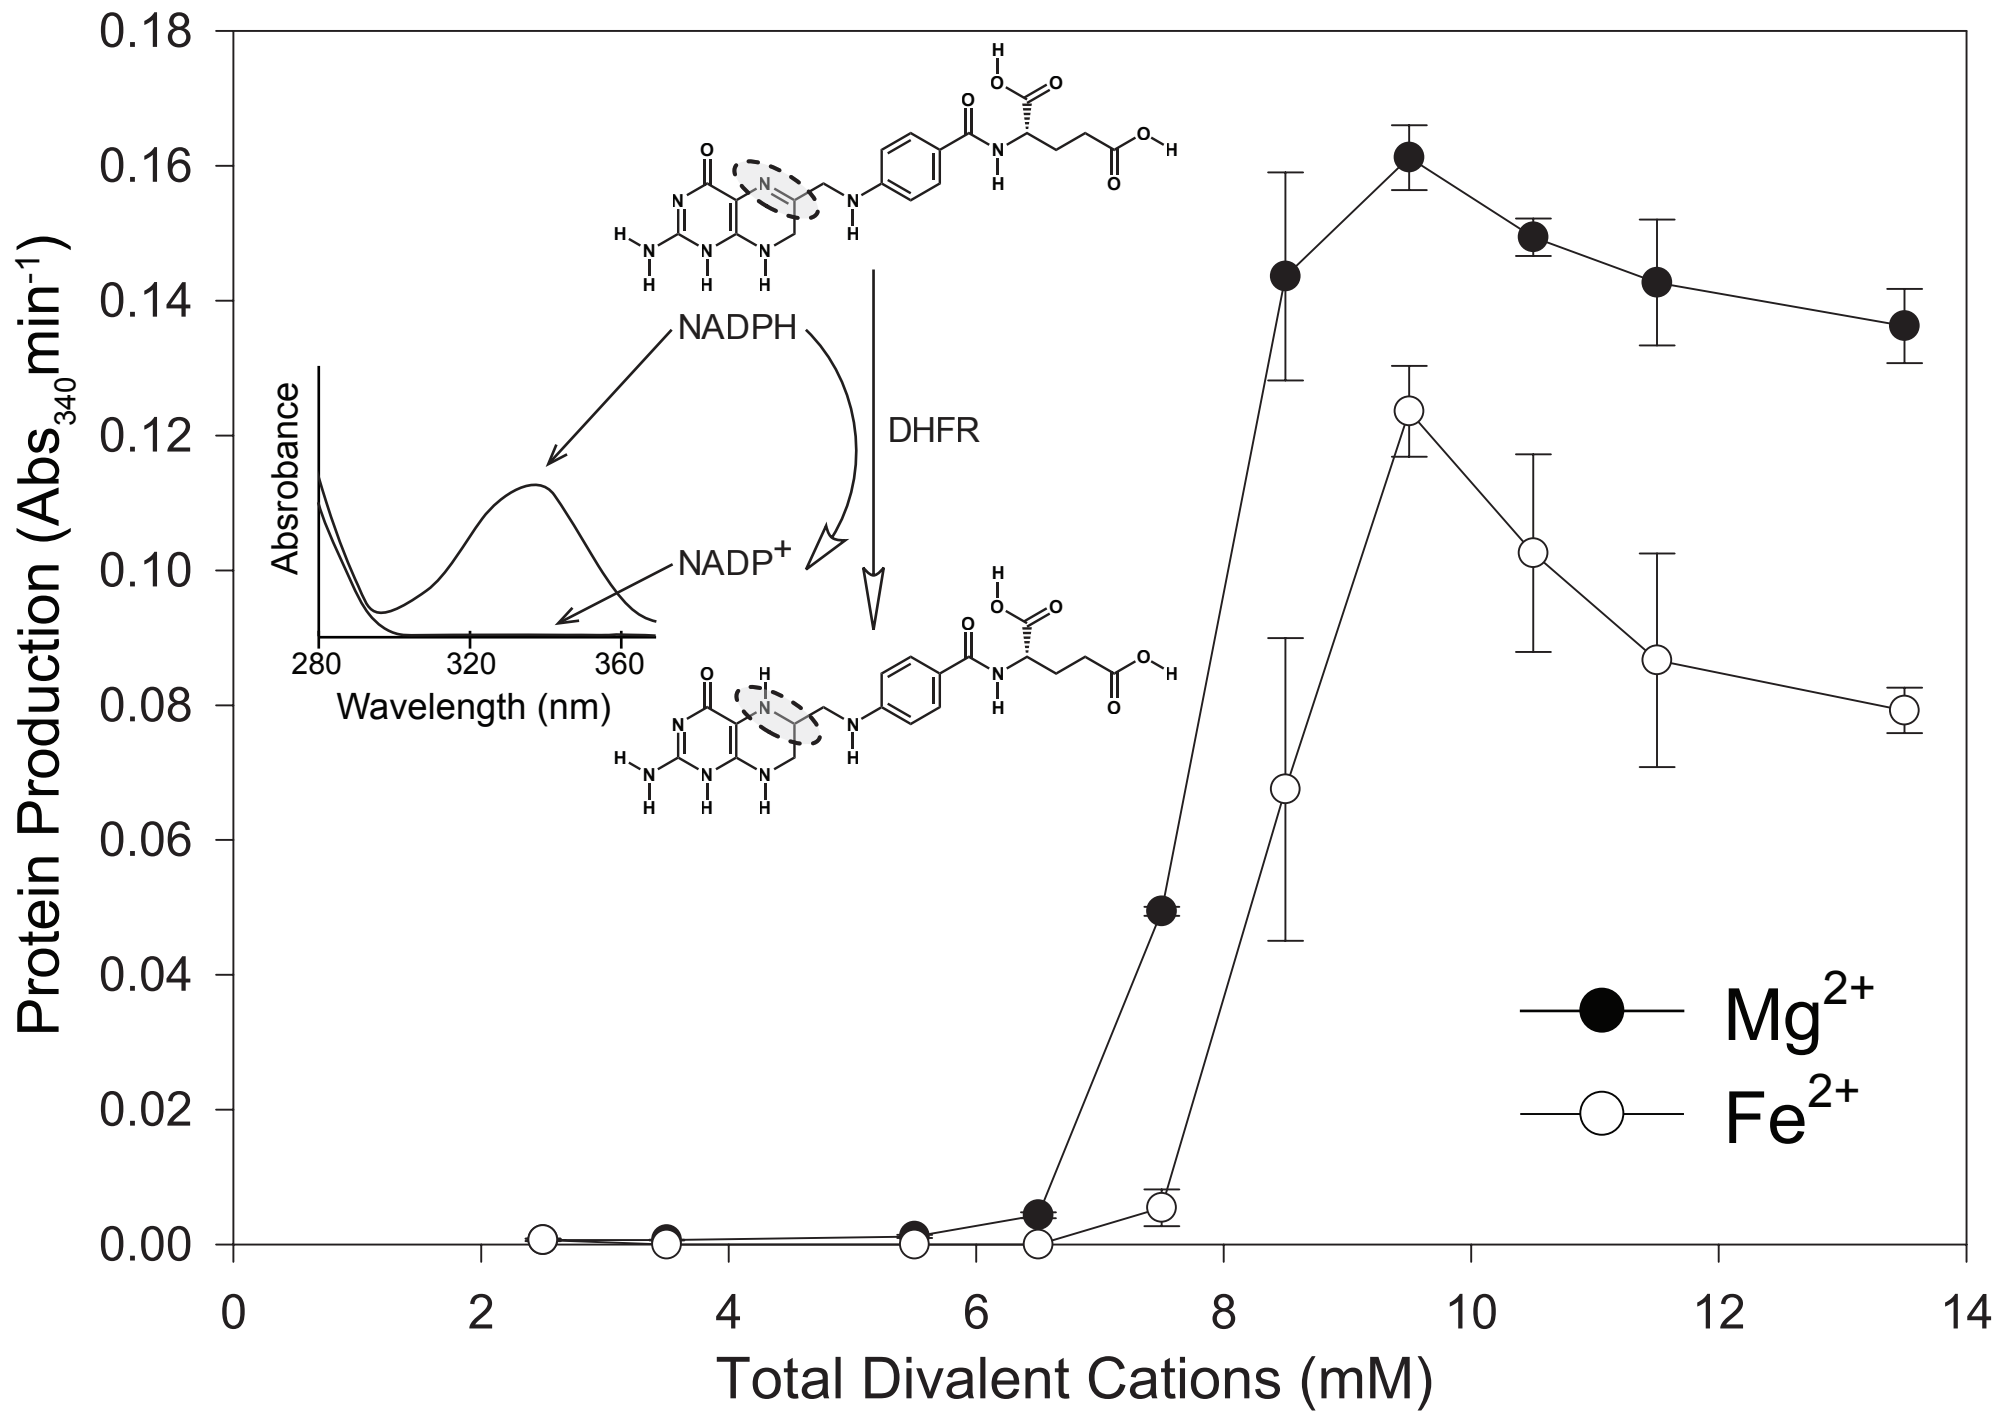

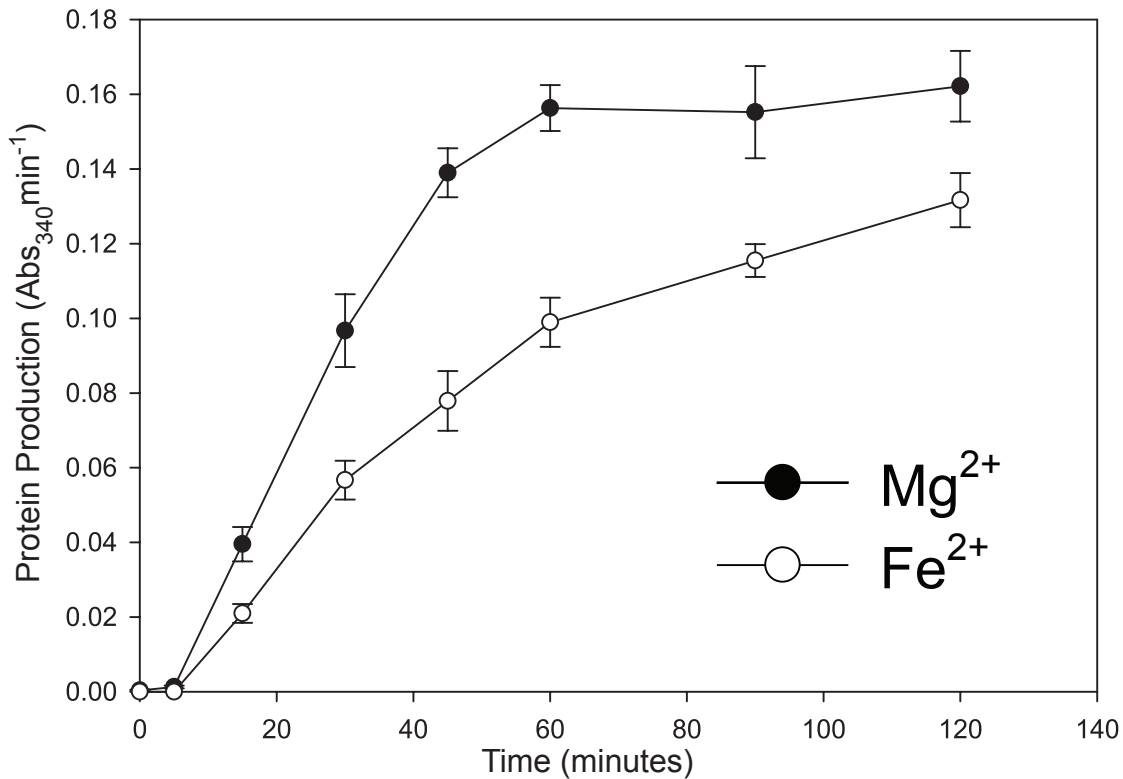



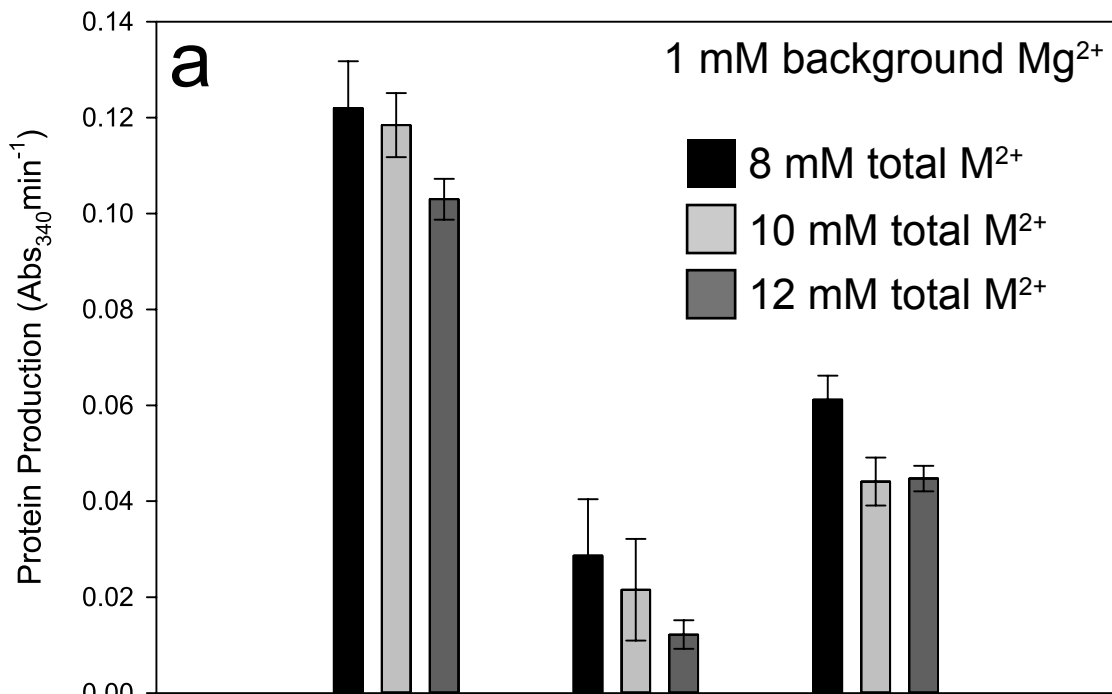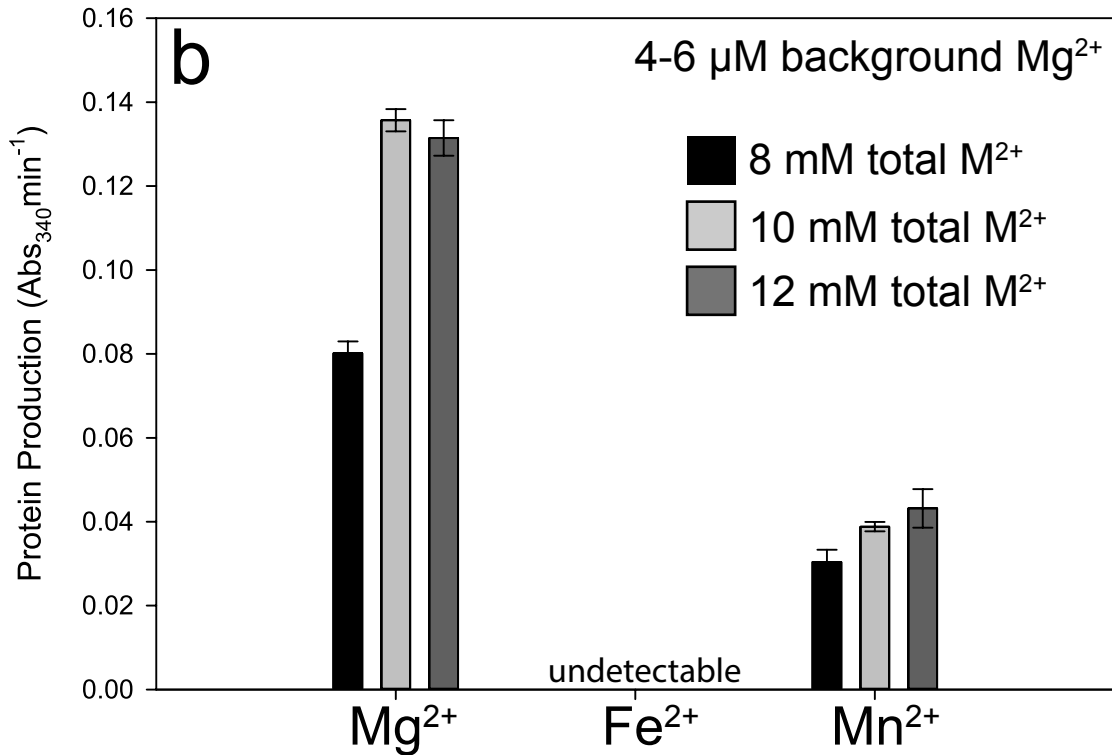

Source: https://www.biorxiv.org/content/10.1101/256958v4.full.pdf
